# Supplementary material
Source: ML conference proceedings conference paper supplement (https://openreview.net/forum?id=mmSFfib6pI)

SCWD Map from ERA5 to GPCP  
Total Precipitation

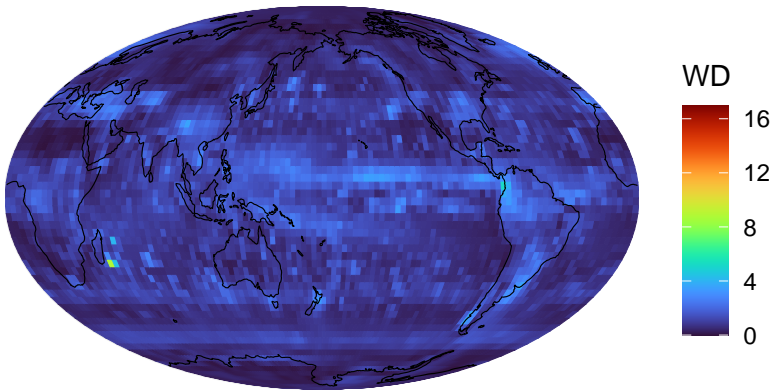

SCWD Map from ACCESS1-3 to GPCP  
Total Precipitation

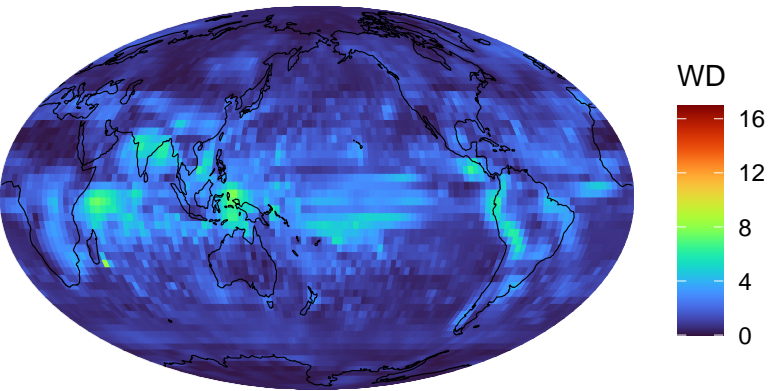

SCWD Map from NCEP to GPCP  
Total Precipitation

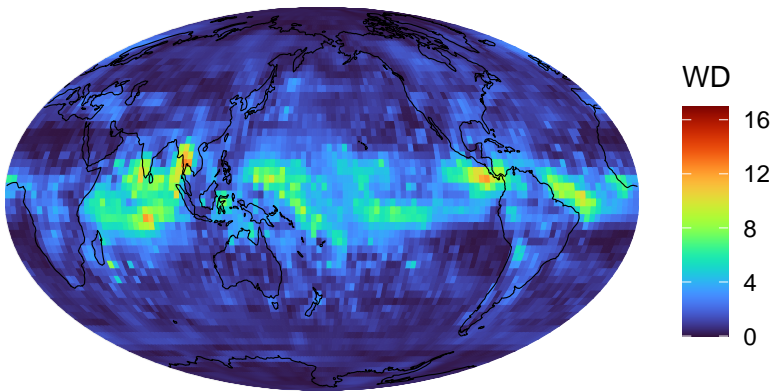

SCWD Map from CanCM4 to GPCP  
Total Precipitation

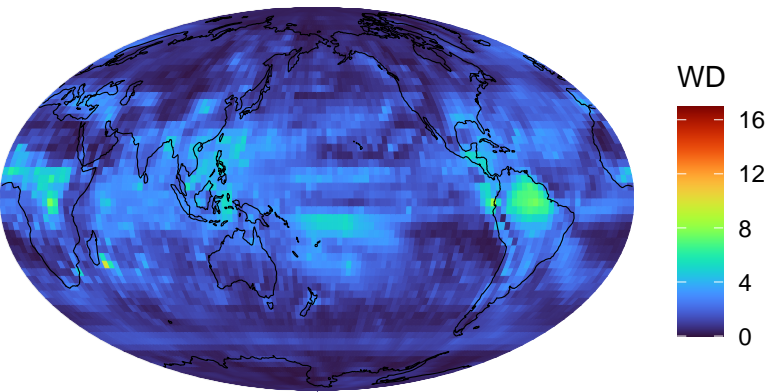

SCWD Map from ACCESS1-0 to GPCP  
Total Precipitation

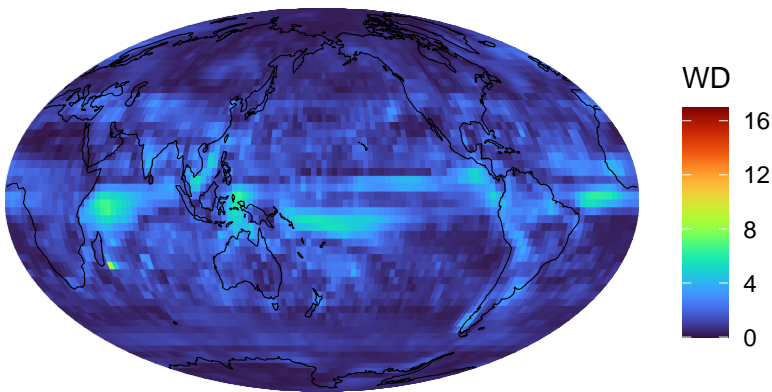

SCWD Map from CanESM2 to GPCP  
Total Precipitation

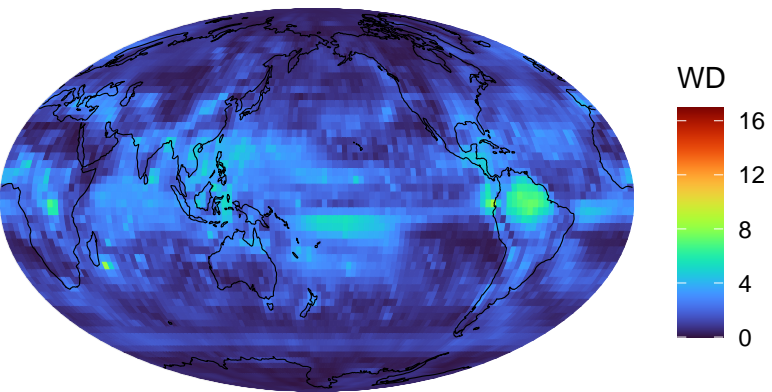

SCWD Map from CMCC–CESM to GPCP  
Total Precipitation

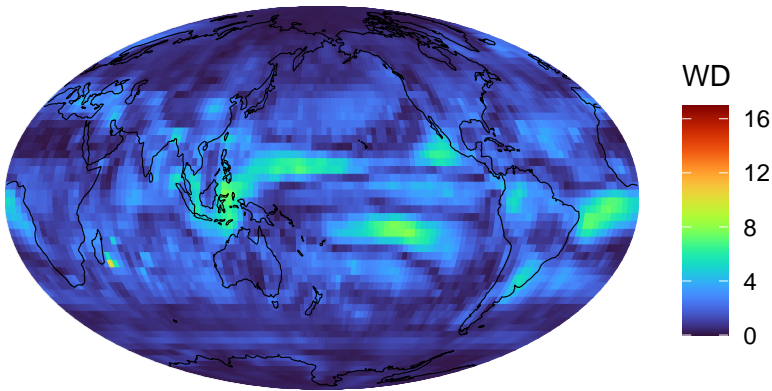

SCWD Map from CNRM–CM5 to GPCP  
Total Precipitation

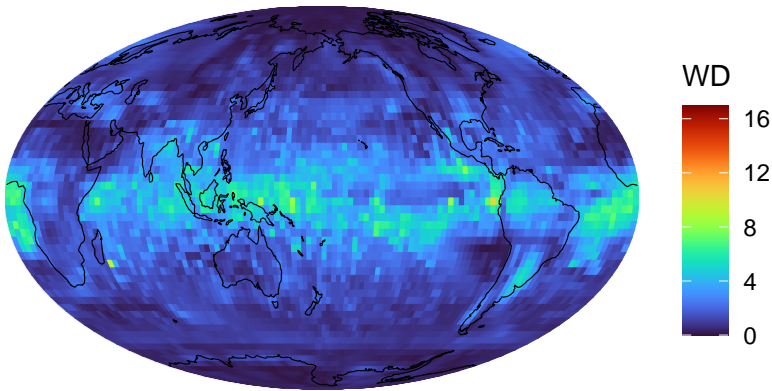

SCWD Map from CMCC–CM to GPCP  
Total Precipitation

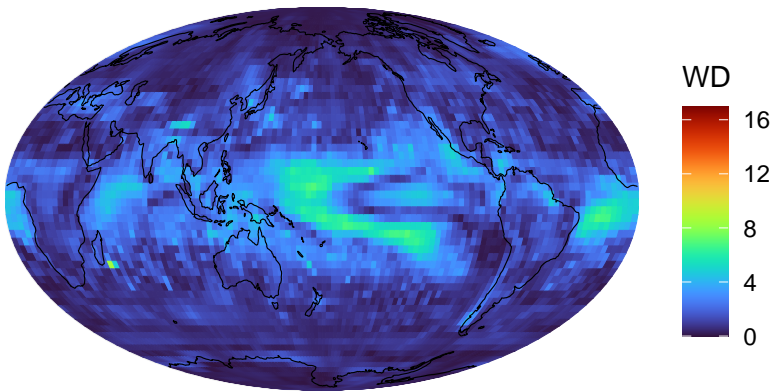

SCWD Map from CSIRO–Mk3–6–0 to GPCP  
Total Precipitation

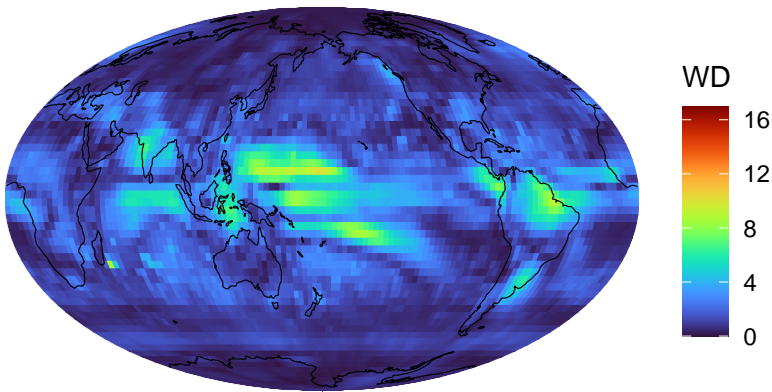

SCWD Map from CMCC–CMS to GPCP  
Total Precipitation

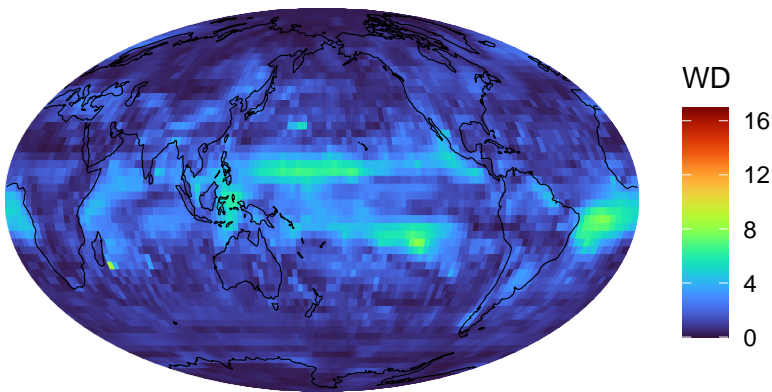

SCWD Map from EC–EARTH to GPCP  
Total Precipitation

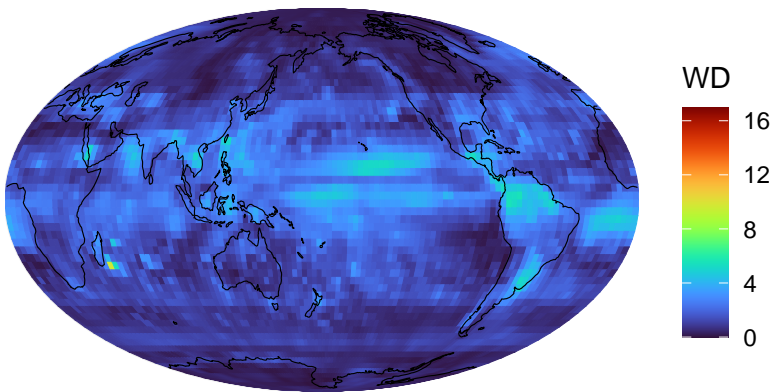



SCWD Map from FGOALS-g2 to GPCP  
Total Precipitation

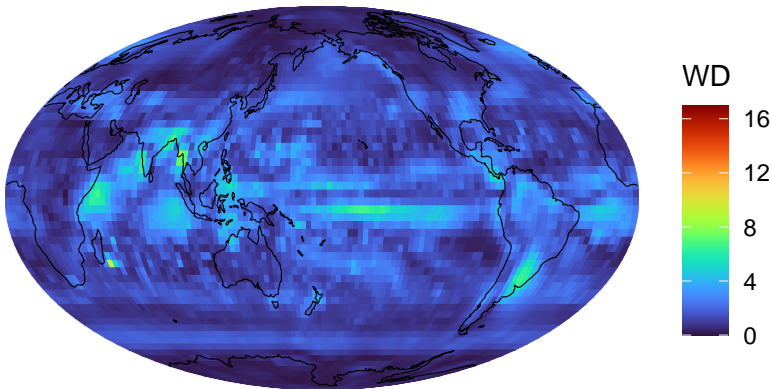

SCWD Map from GFDL-ESM2G to GPCP  
Total Precipitation

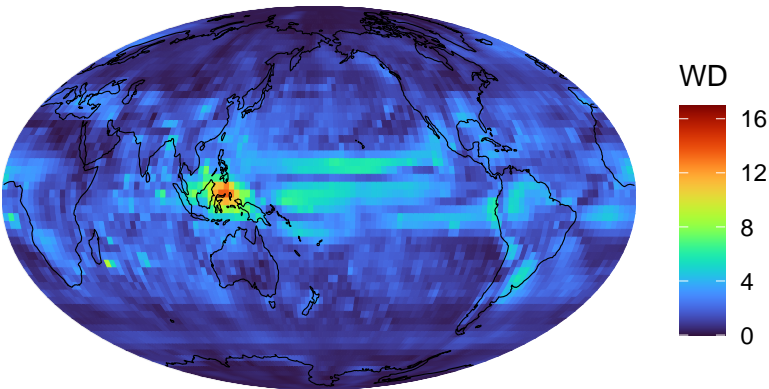

SCWD Map from FGOALS-s2 to GPCP  
Total Precipitation

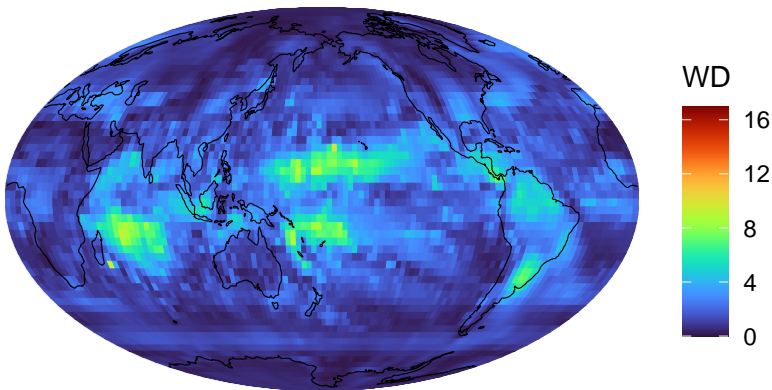

SCWD Map from GFDL-ESM2M to GPCP  
Total Precipitation

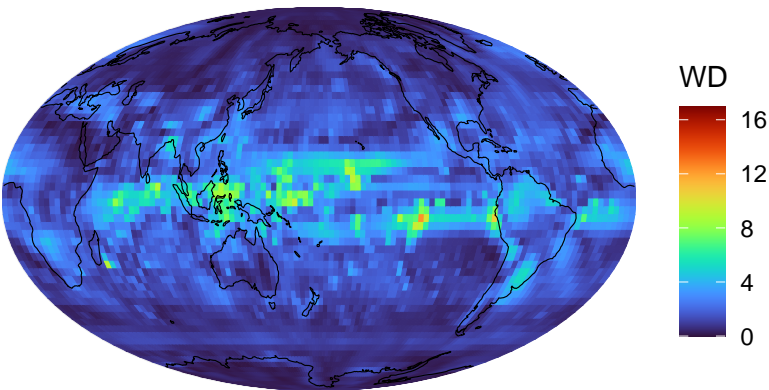

SCWD Map from GFDL-CM3 to GPCP  
Total Precipitation

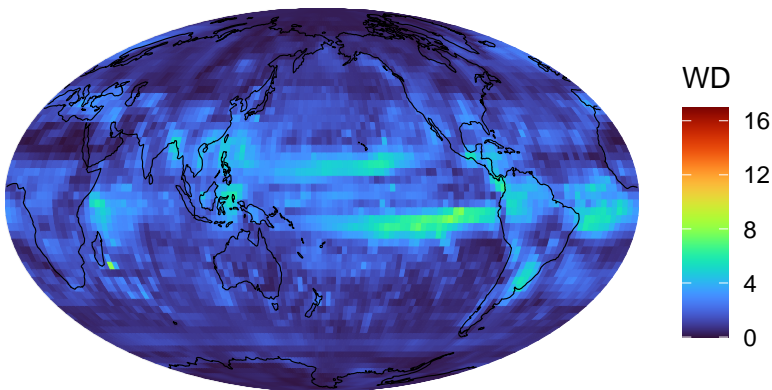

SCWD Map from HadCM3 to GPCP  
Total Precipitation

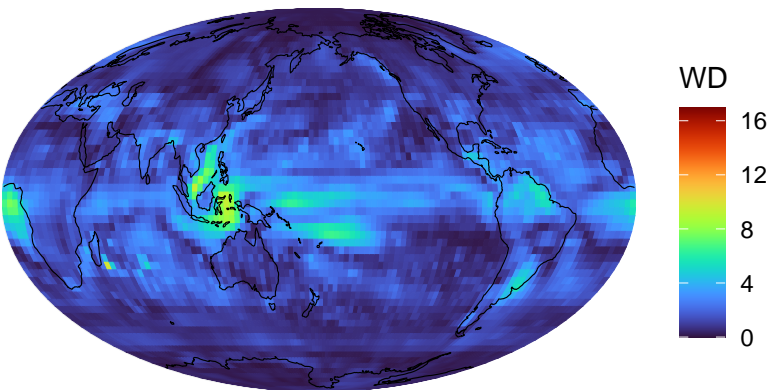

SCWD Map from HadGEM2–AO to GPCP  
Total Precipitation

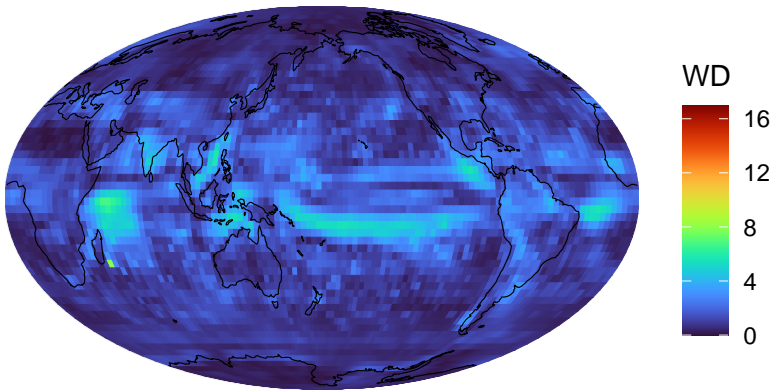

SCWD Map from inmcm4 to GPCP  
Total Precipitation

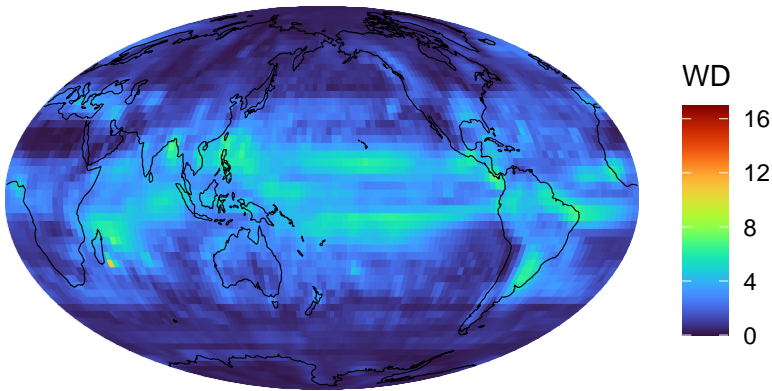

SCWD Map from HadGEM2–CC to GPCP  
Total Precipitation

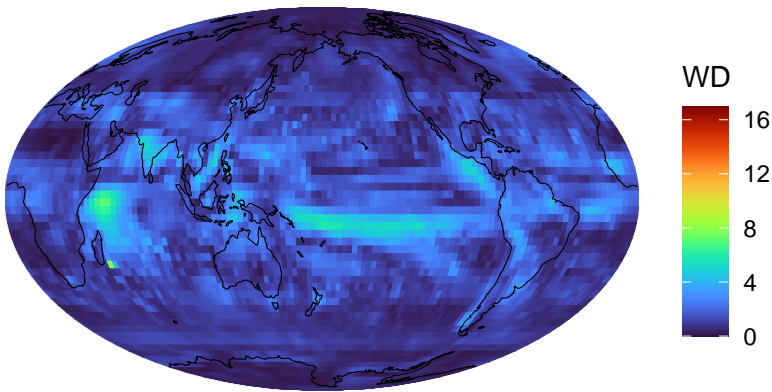

SCWD Map from IPSL–CM5A–LR to GPCP  
Total Precipitation

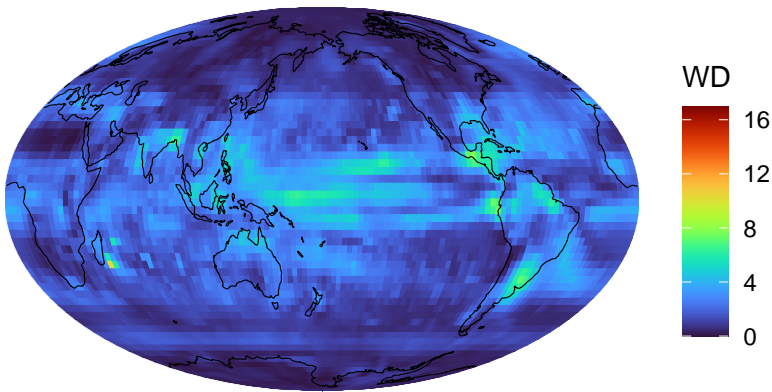

SCWD Map from HadGEM2–ES to GPCP  
Total Precipitation

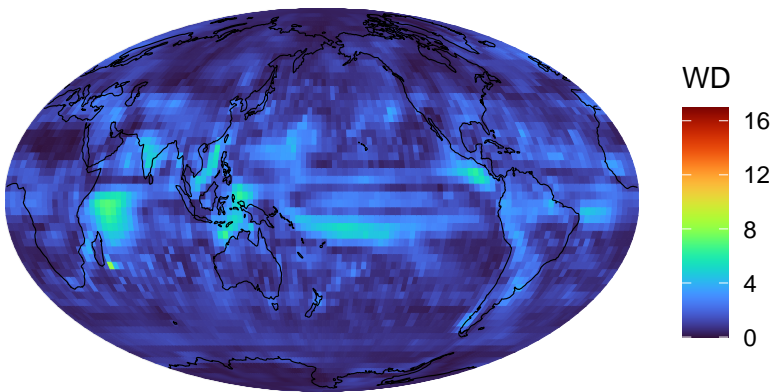

SCWD Map from IPSL–CM5A–MR to GPCP  
Total Precipitation

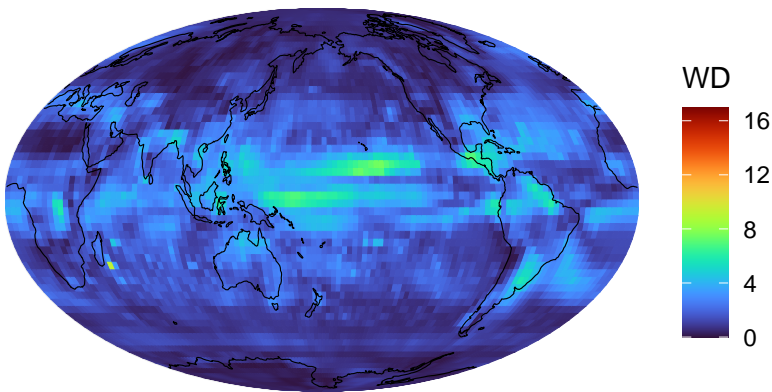



SCWD Map from IPSL-CM5B-LR to GPCP  
Total Precipitation

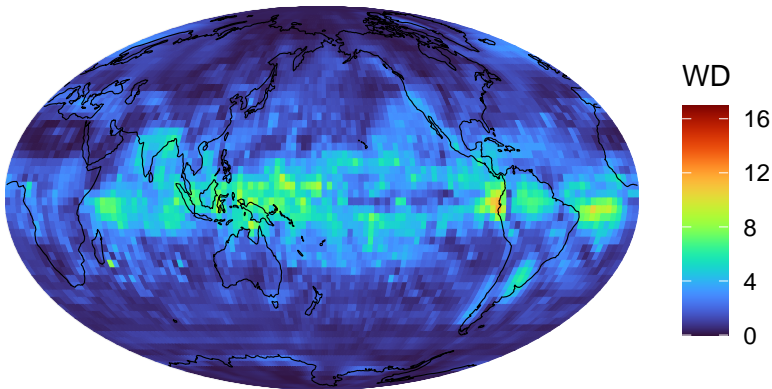

SCWD Map from MIROC4h to GPCP  
Total Precipitation

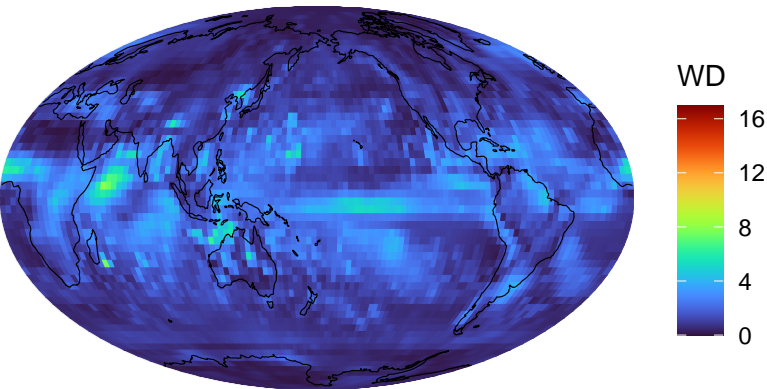

SCWD Map from MIROC-ESM-CHEM to GPCP  
Total Precipitation

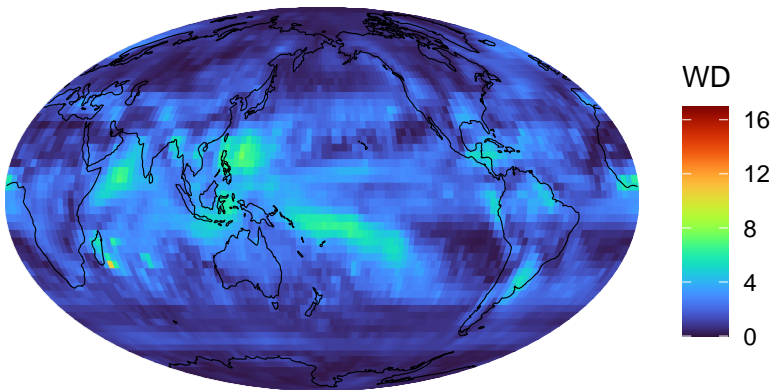

SCWD Map from MIROC5 to GPCP  
Total Precipitation

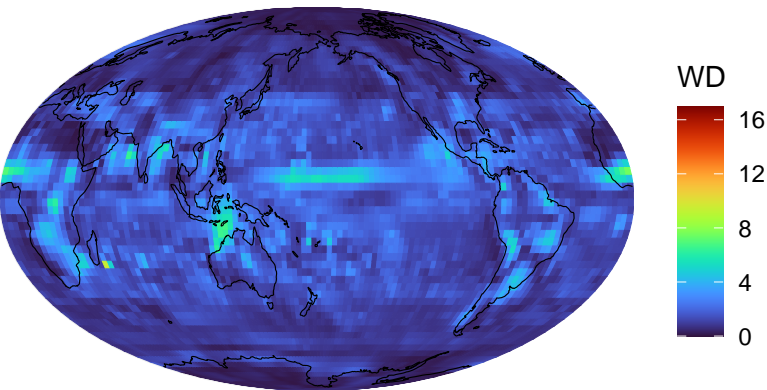

SCWD Map from MIROC-ESM to GPCP  
Total Precipitation

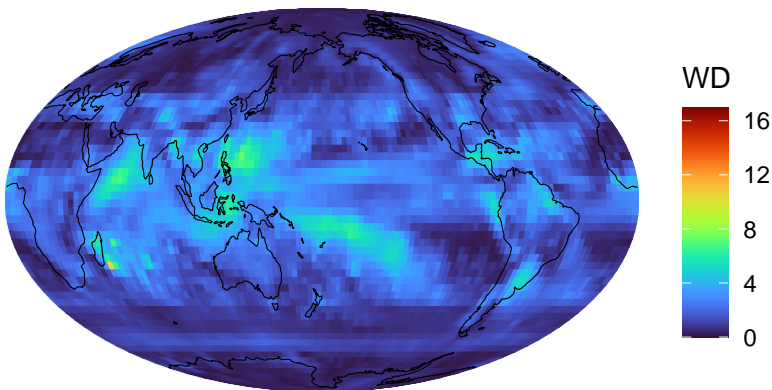

SCWD Map from MPI-ESM-LR to GPCP  
Total Precipitation

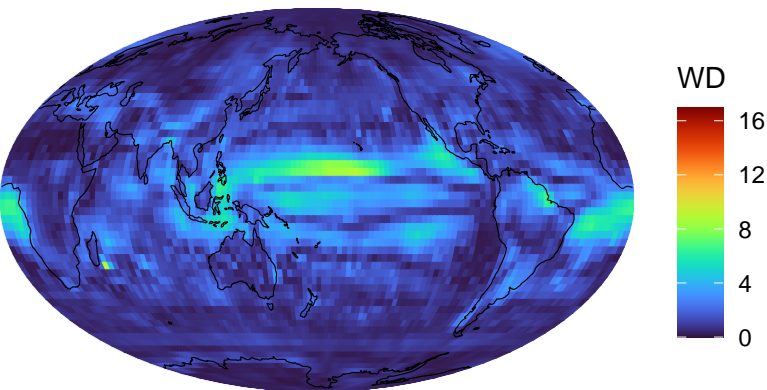

SCWD Map from MPI-ESM-MR to GPCP  
Total Precipitation

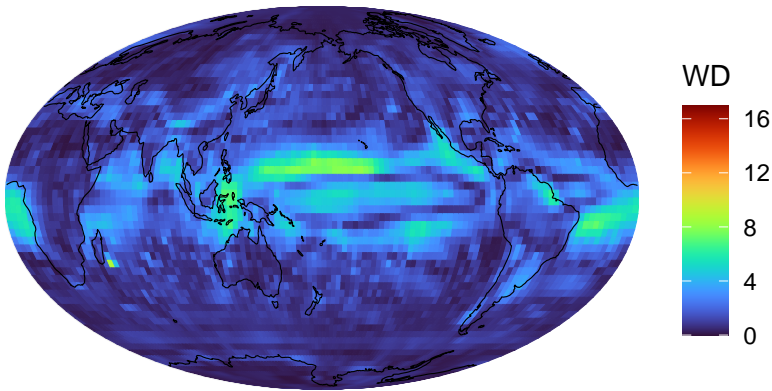

SCWD Map from MRI-ESM1 to GPCP  
Total Precipitation

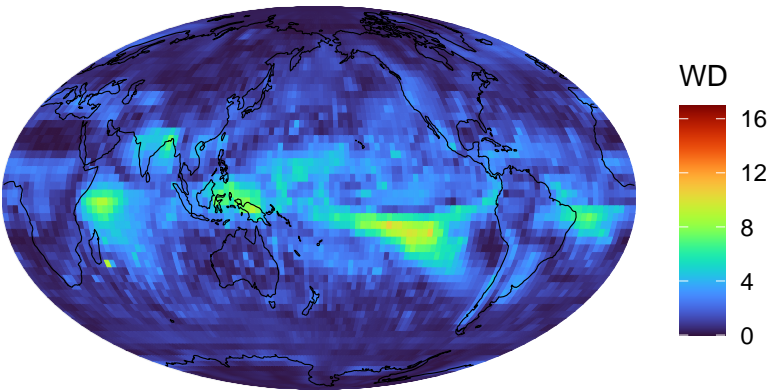

SCWD Map from MPI-ESM-P to GPCP  
Total Precipitation

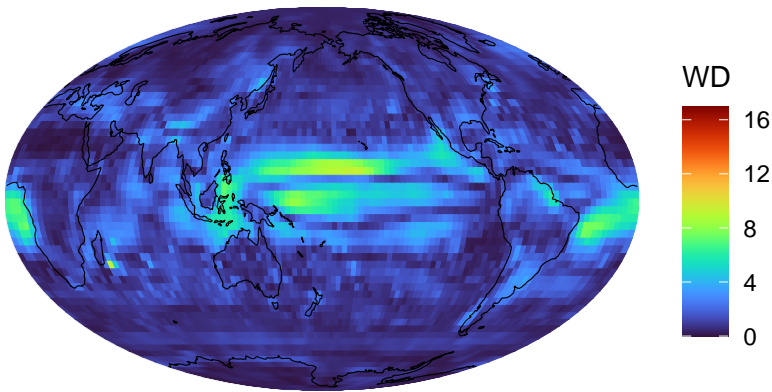

SCWD Map from NorESM1-M to GPCP  
Total Precipitation

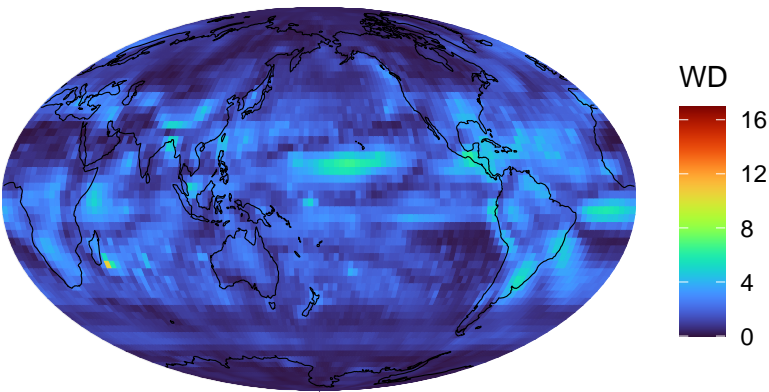

SCWD Map from MRI-CGCM3 to GPCP  
Total Precipitation

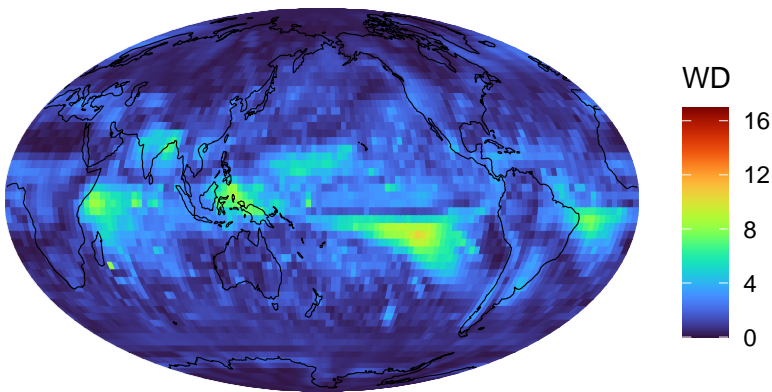

SCWD Map from ACCESS-CM2 to GPCP  
Total Precipitation

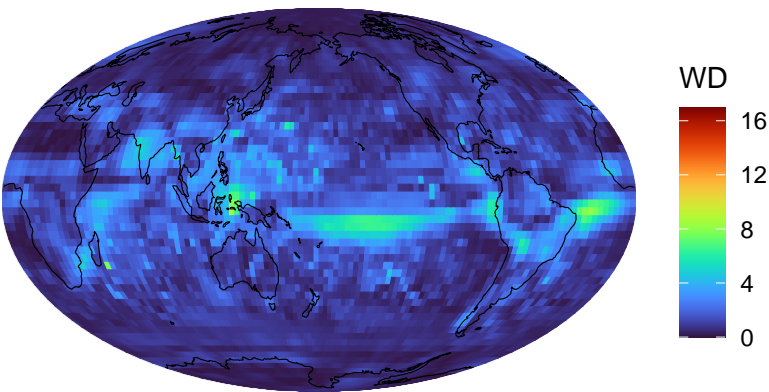



SCWD Map from ACCESS-ESM1-5 to GPCP  
Total Precipitation

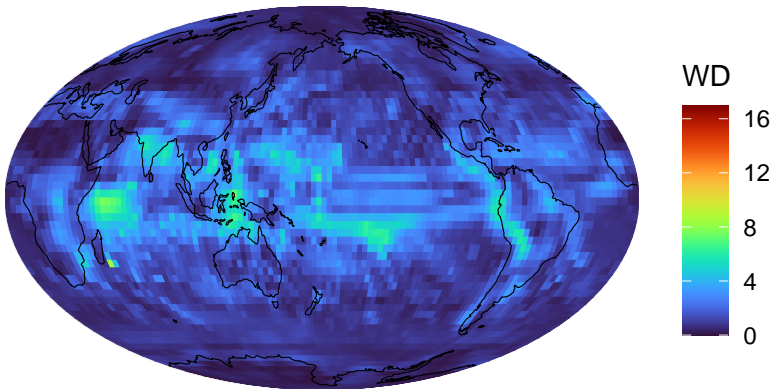

SCWD Map from BCC-ESM1 to GPCP  
Total Precipitation

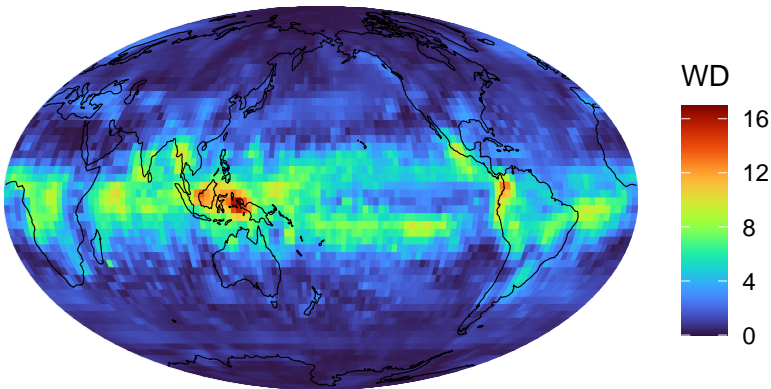

SCWD Map from AWI-CM-1-1-MR to GPCP  
Total Precipitation

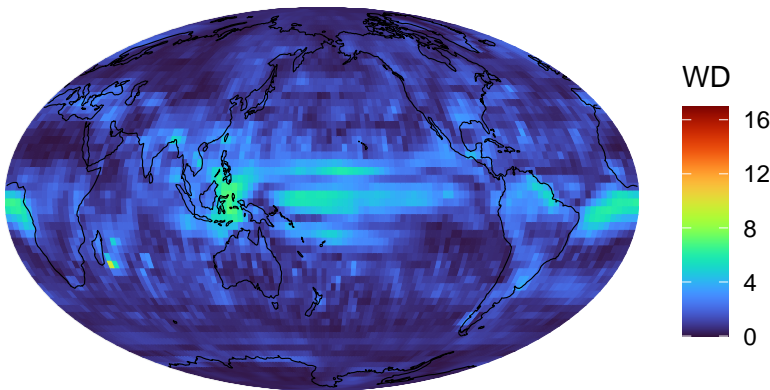

SCWD Map from CanESM5 to GPCP  
Total Precipitation

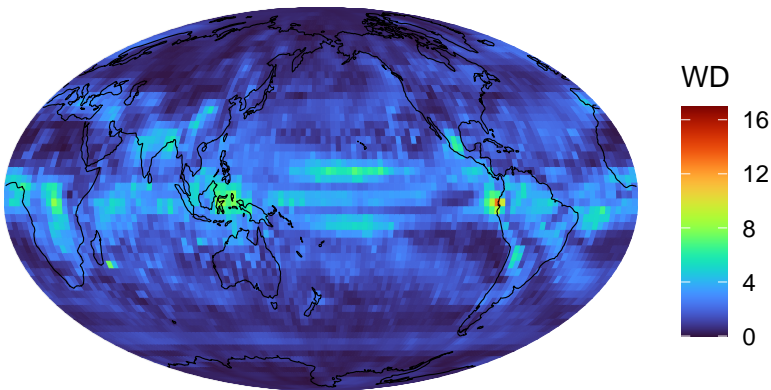

SCWD Map from AWI-ESM-1-1-LR to GPCP  
Total Precipitation

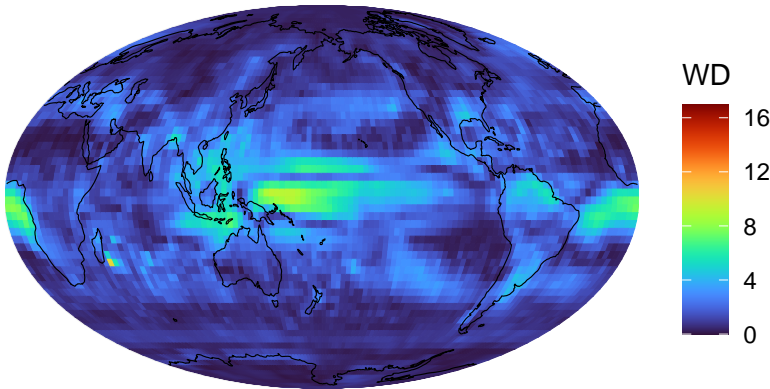

SCWD Map from CESM2-FV2 to GPCP  
Total Precipitation

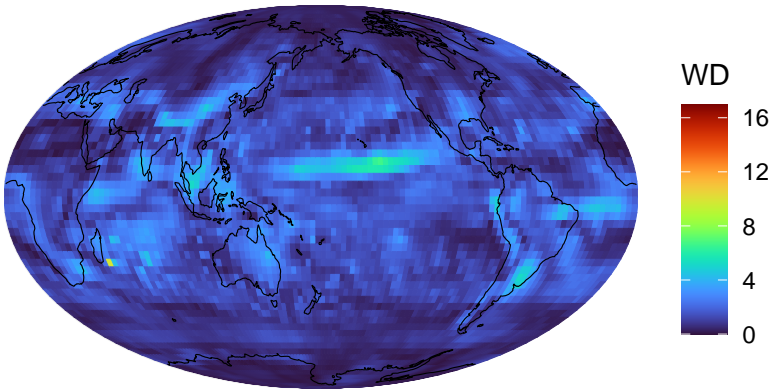

SCWD Map from CESM2-WACCM-FV2 to GPCP  
Total Precipitation

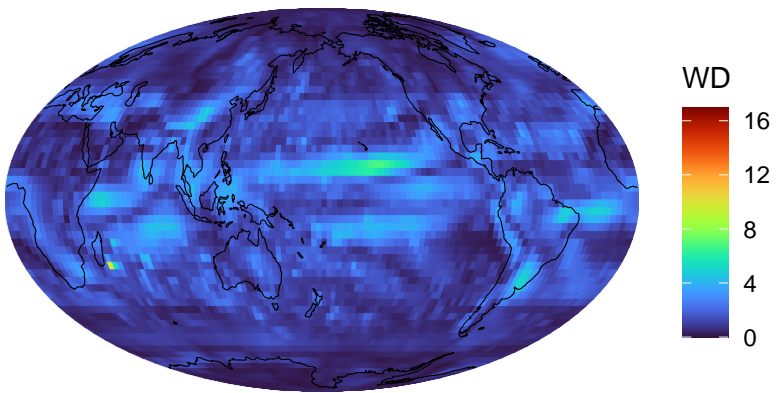

SCWD Map from CMCC-CM2-HR4 to GPCP  
Total Precipitation

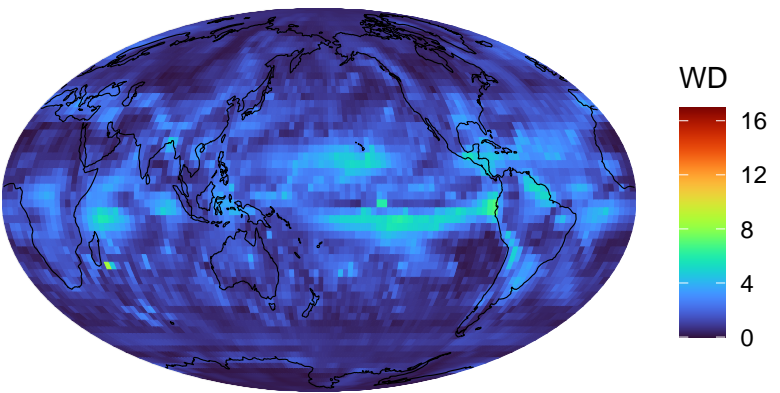

SCWD Map from CESM2-WACCM to GPCP  
Total Precipitation

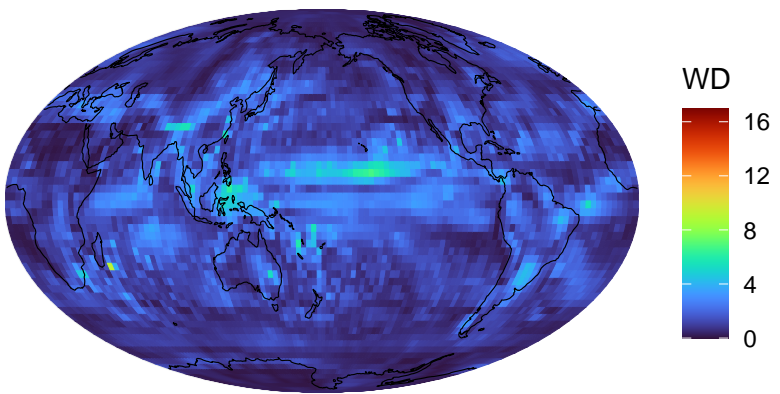

SCWD Map from CMCC-CM2-SR5 to GPCP  
Total Precipitation

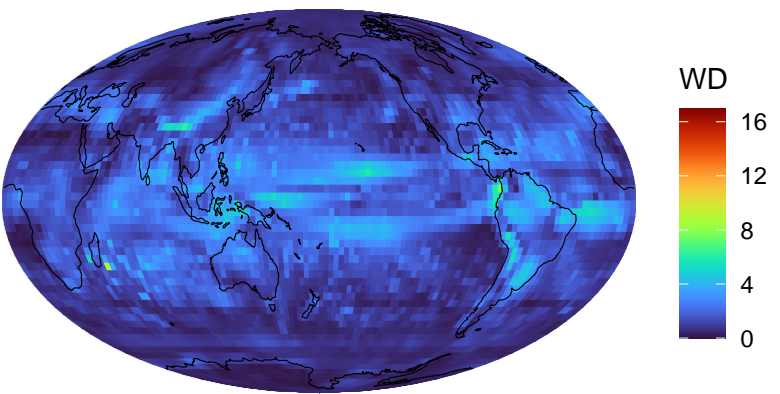

SCWD Map from CESM2 to GPCP  
Total Precipitation

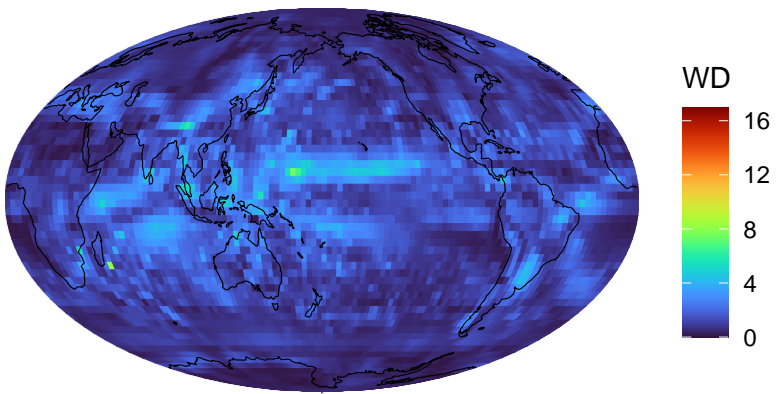

SCWD Map from CMCC-ESM2 to GPCP  
Total Precipitation

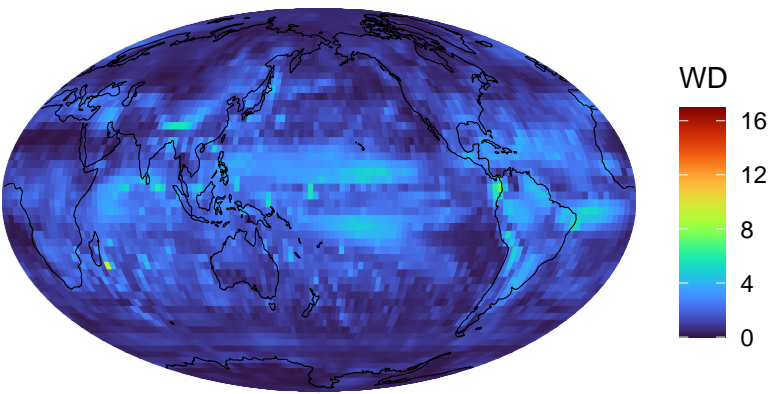



SCWD Map from E3SM-1-0 to GPCP  
Total Precipitation

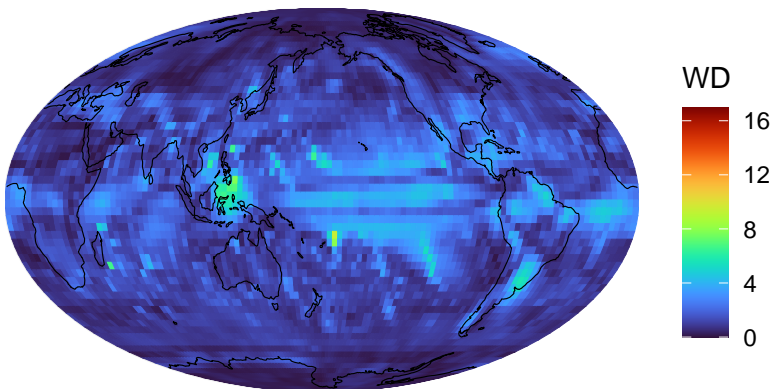

SCWD Map from EC-Earth3-AerChem to GPCP  
Total Precipitation

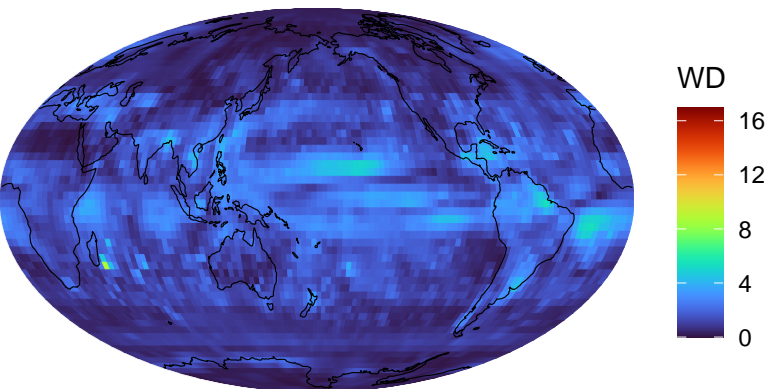

SCWD Map from E3SM-2-0-NARRM to GPCP  
Total Precipitation

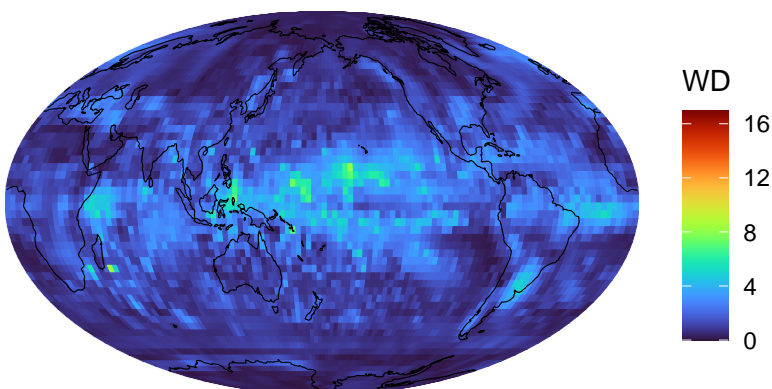

SCWD Map from EC-Earth3-CC to GPCP  
Total Precipitation

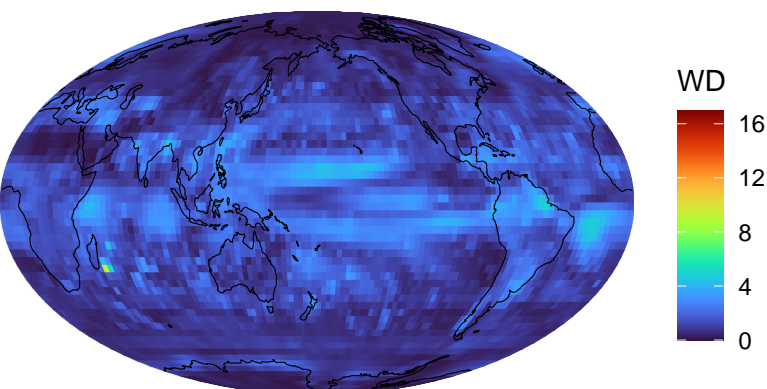

SCWD Map from E3SM-2-0 to GPCP  
Total Precipitation

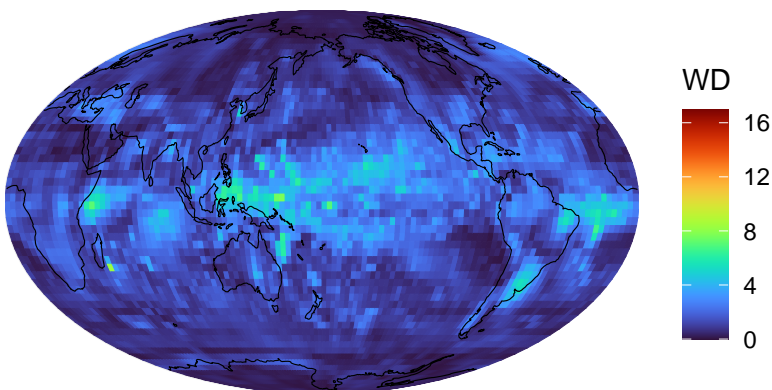

SCWD Map from EC-Earth3-Veg-LR to GPCP  
Total Precipitation

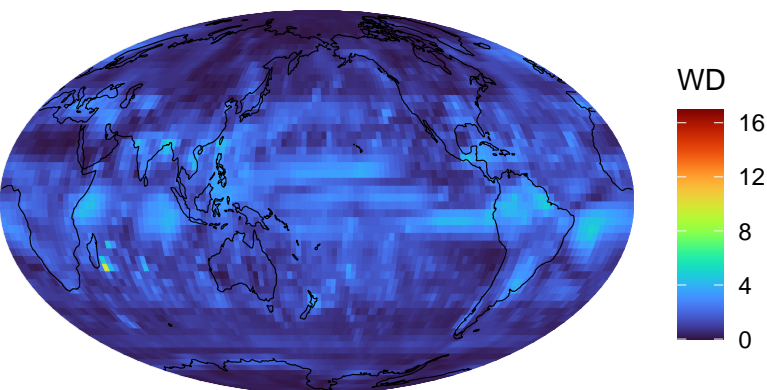

SCWD Map from EC–Earth3–Veg to GPCP  
Total Precipitation

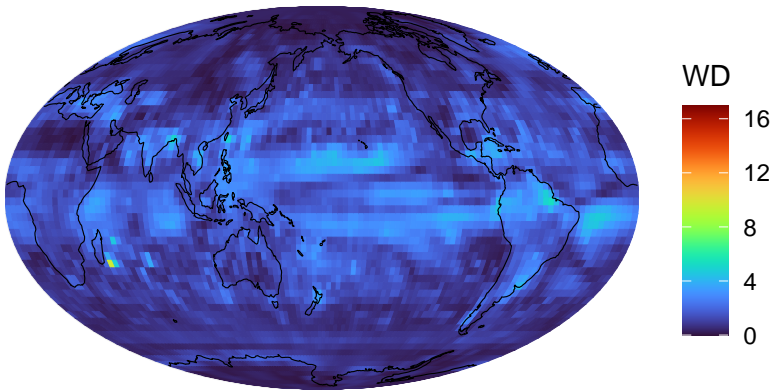

SCWD Map from FGOALS–g3 to GPCP  
Total Precipitation

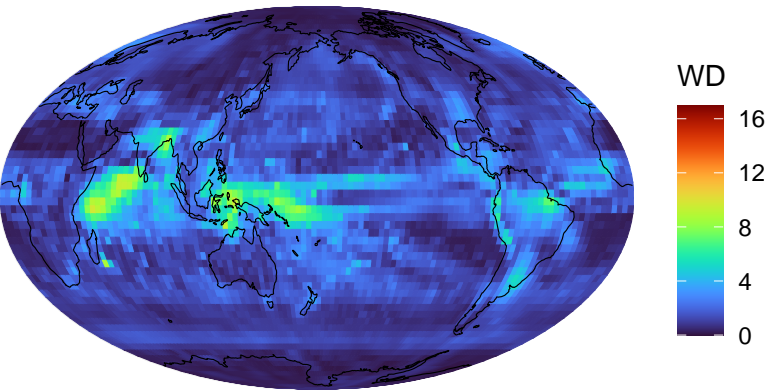

SCWD Map from EC–Earth3 to GPCP  
Total Precipitation

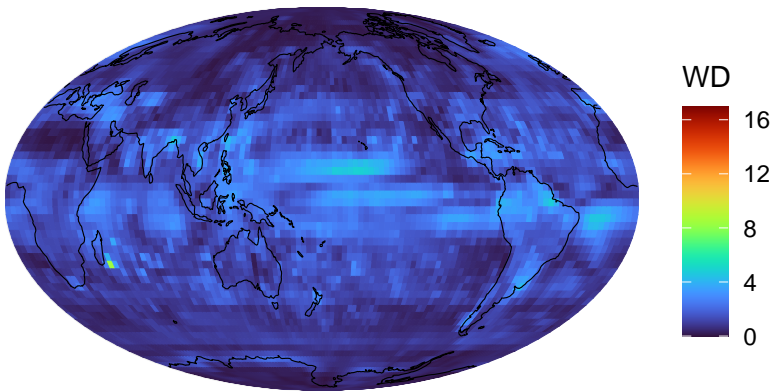

SCWD Map from GFDL–CM4 to GPCP  
Total Precipitation

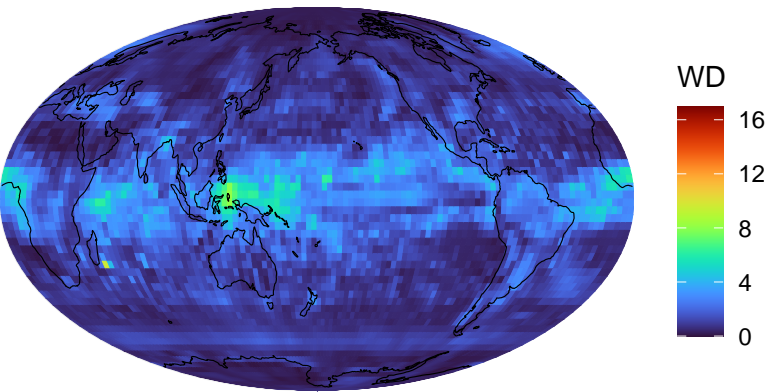

SCWD Map from FGOALS–f3–L to GPCP  
Total Precipitation

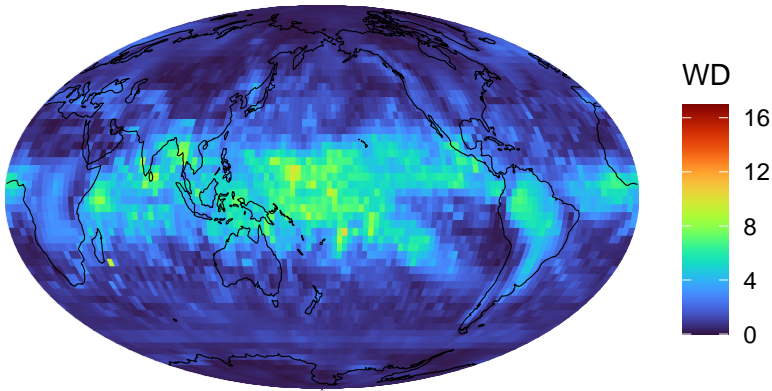

SCWD Map from GFDL–ESM4 to GPCP  
Total Precipitation

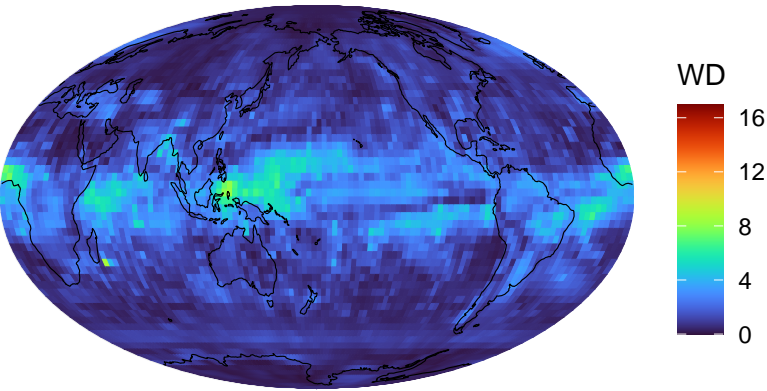



SCWD Map from GISS-E2-2-G to GPCP  
Total Precipitation

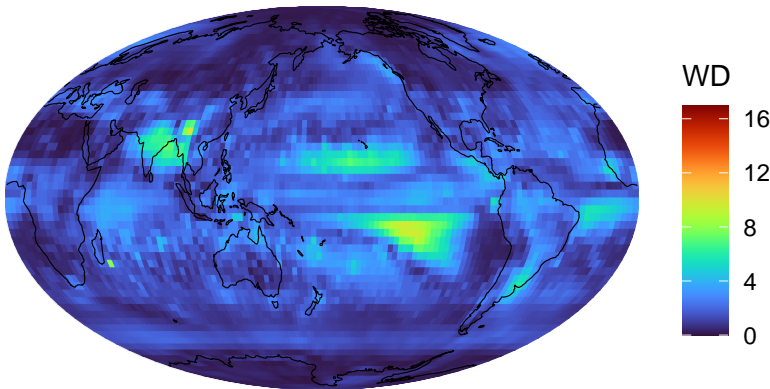

SCWD Map from INM-CM4-8 to GPCP  
Total Precipitation

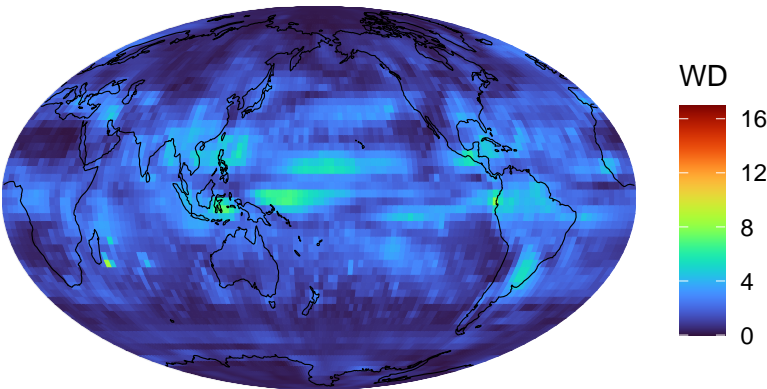

SCWD Map from ICON-ESM-LR to GPCP  
Total Precipitation

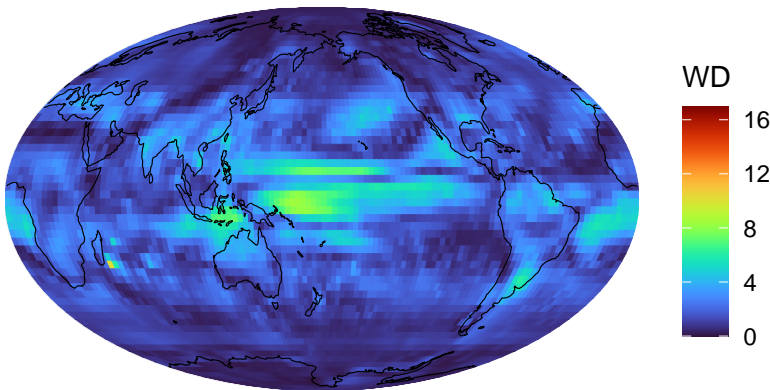

SCWD Map from INM-CM5-0 to GPCP  
Total Precipitation

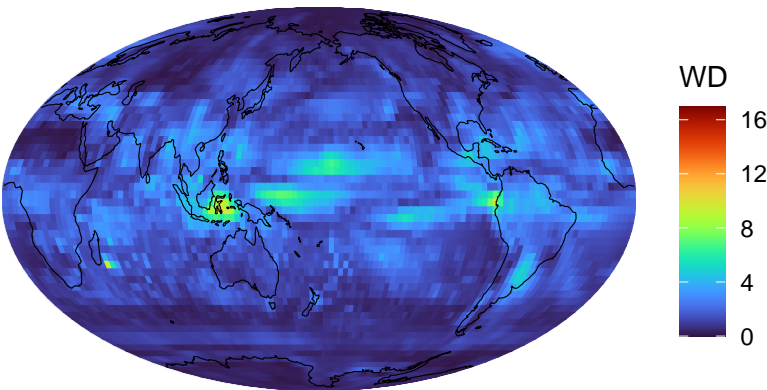

SCWD Map from IITM-ESM to GPCP  
Total Precipitation

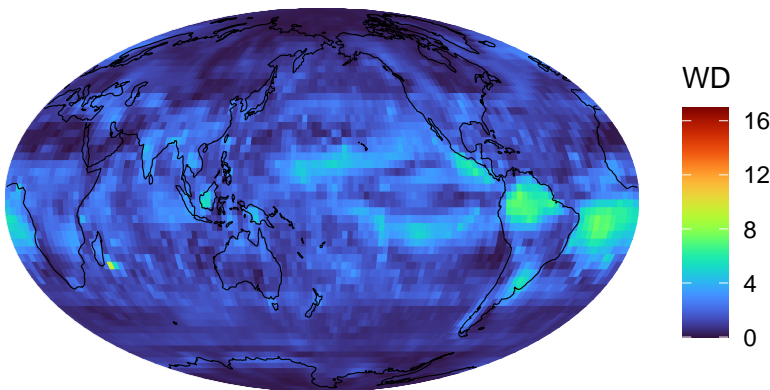

SCWD Map from IPSL-CM5A2-INCA to GPCP  
Total Precipitation

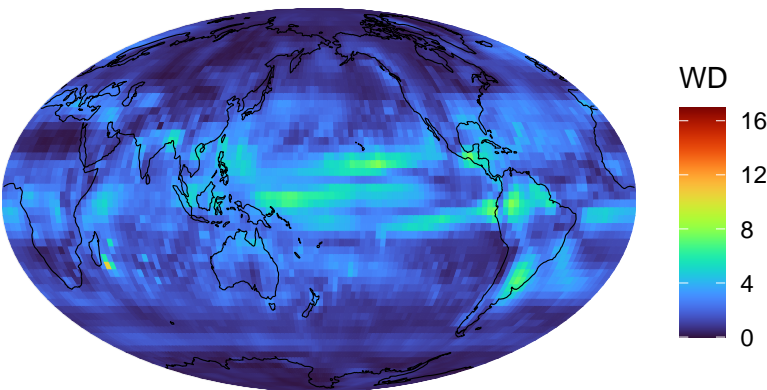

SCWD Map from IPSL-CM6A-LR-INCA to GPCP  
Total Precipitation

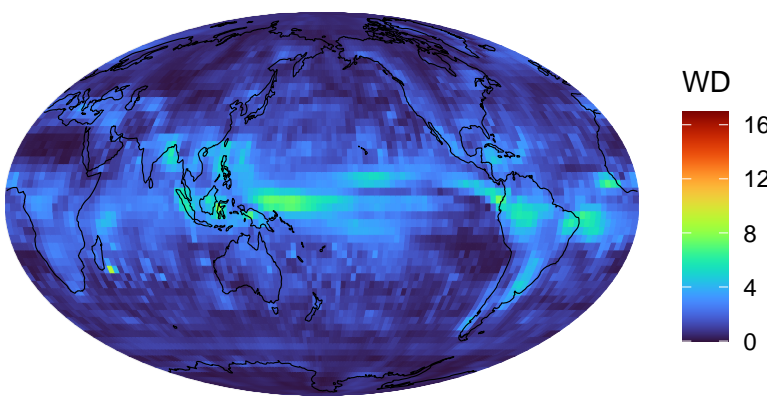

SCWD Map from KIOST-ESM to GPCP  
Total Precipitation

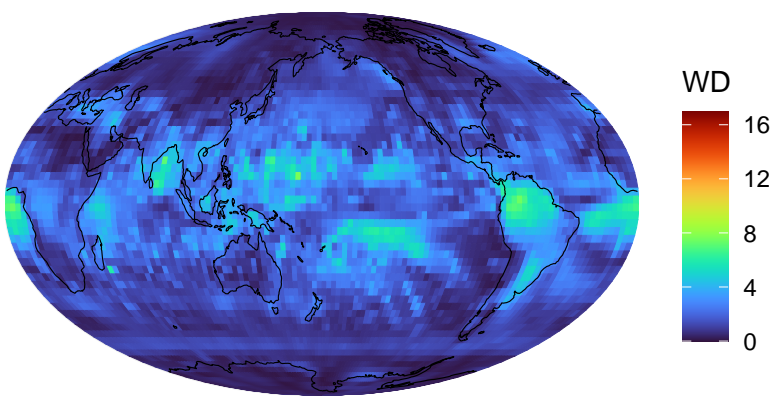

SCWD Map from IPSL-CM6A-LR to GPCP  
Total Precipitation

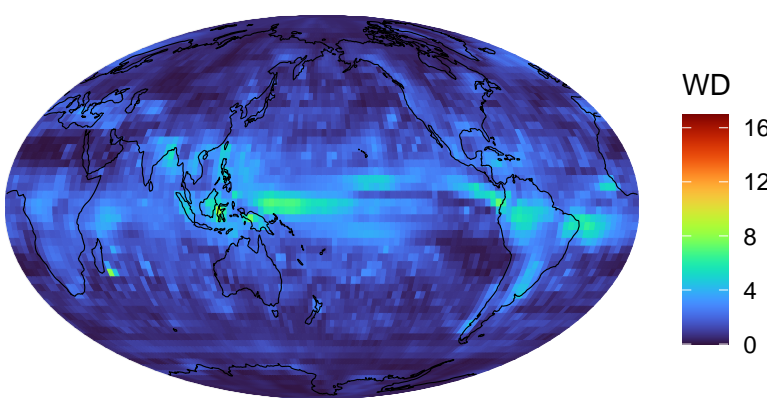

SCWD Map from MIROC6 to GPCP  
Total Precipitation

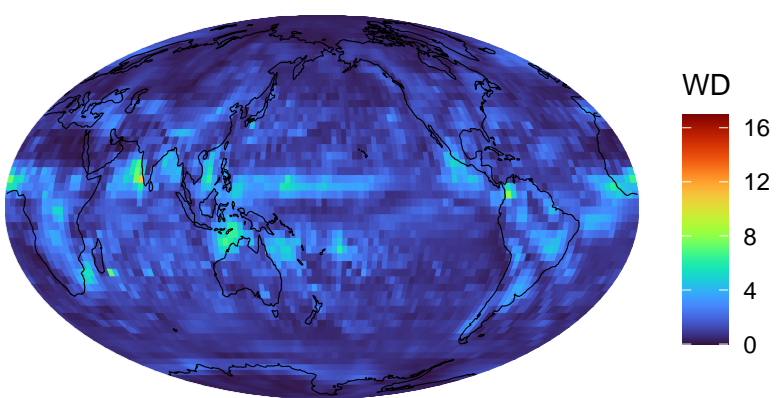

SCWD Map from KACE-1-0-G to GPCP  
Total Precipitation

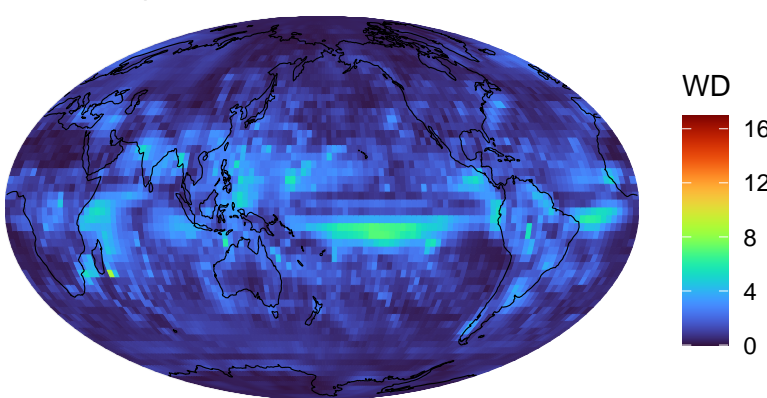

SCWD Map from MPI-ESM-1-2-HAM to GPCP  
Total Precipitation

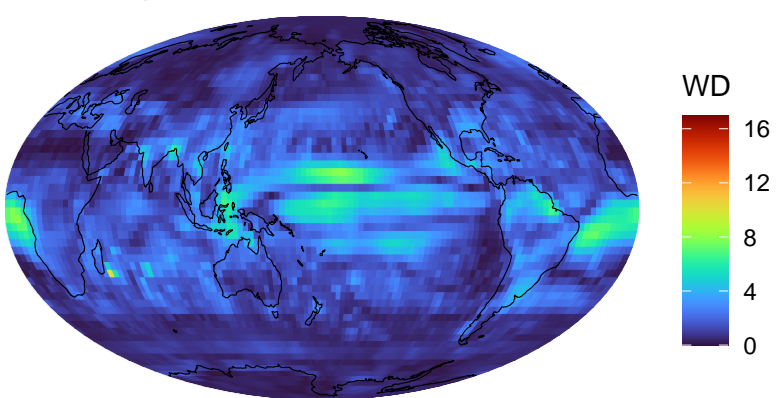



SCWD Map from MPI-ESM1-2-HR to GPCP  
Total Precipitation

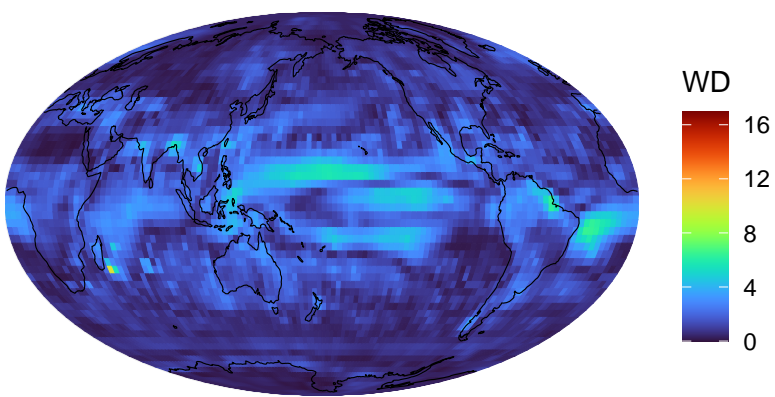

SCWD Map from NESM3 to GPCP  
Total Precipitation

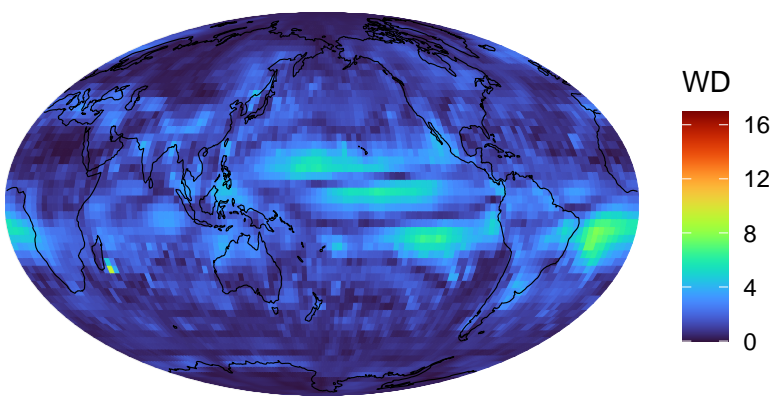

SCWD Map from MPI-ESM1-2-LR to GPCP  
Total Precipitation

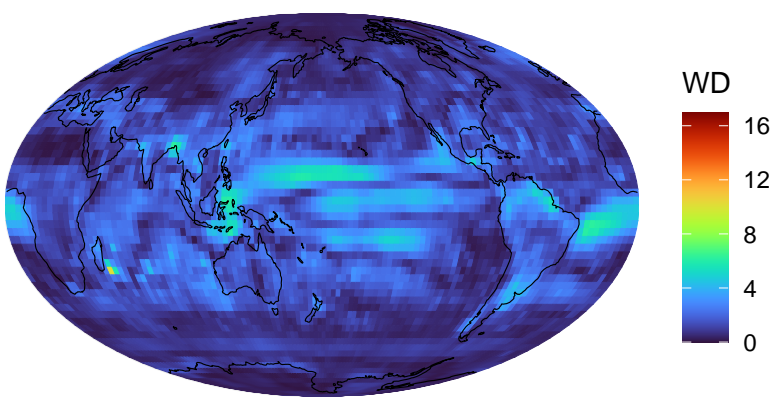

SCWD Map from NorCPM1 to GPCP  
Total Precipitation

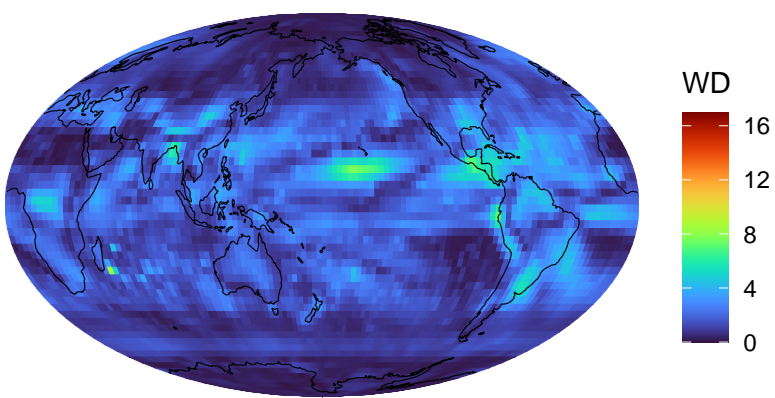

SCWD Map from MRI-ESM2-0 to GPCP  
Total Precipitation

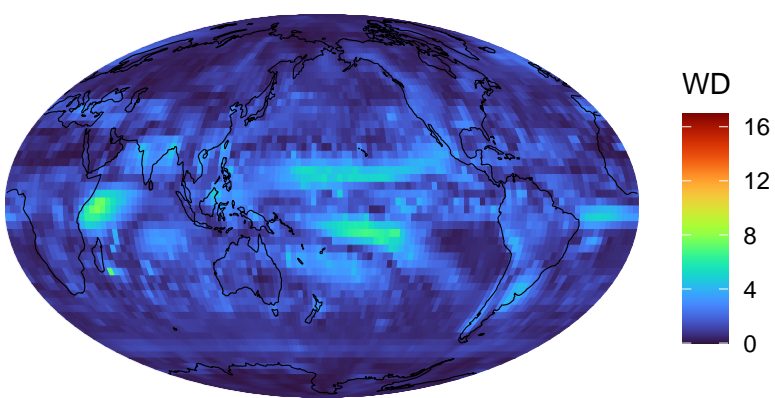

SCWD Map from NorESM2-LM to GPCP  
Total Precipitation

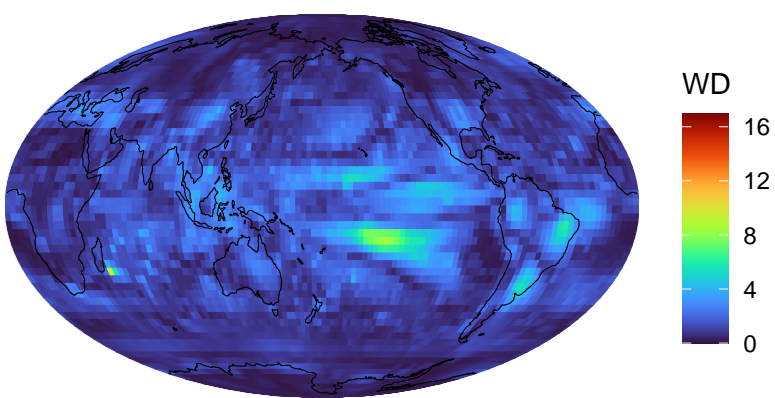

SCWD Map from NorESM2-MM to GPCP  
Total Precipitation

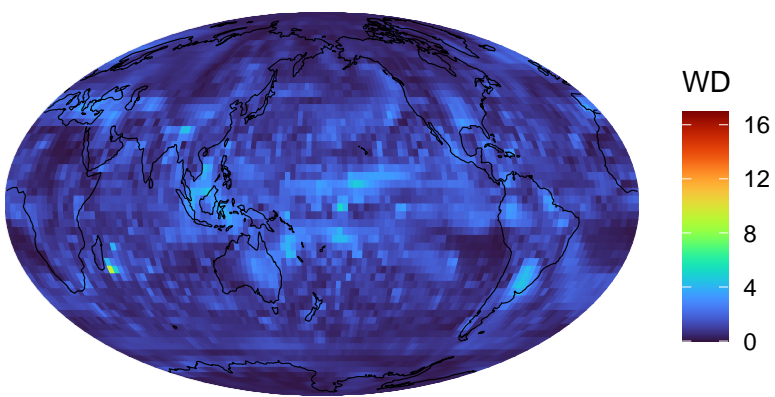

SCWD Map from SAM0-UNICON to GPCP  
Total Precipitation

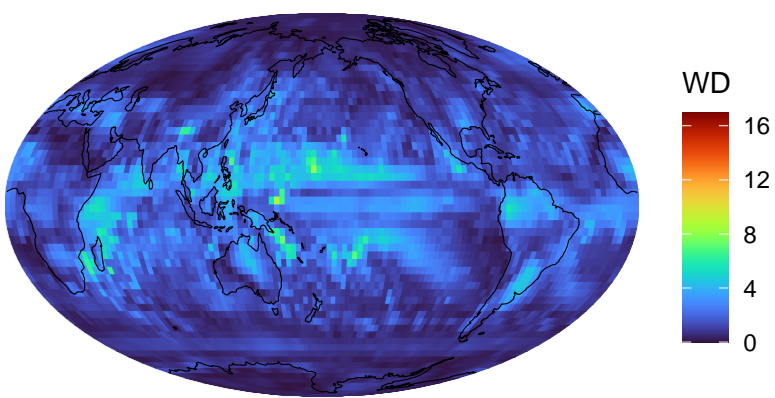

SCWD Map from TaiESM1 to GPCP  
Total Precipitation

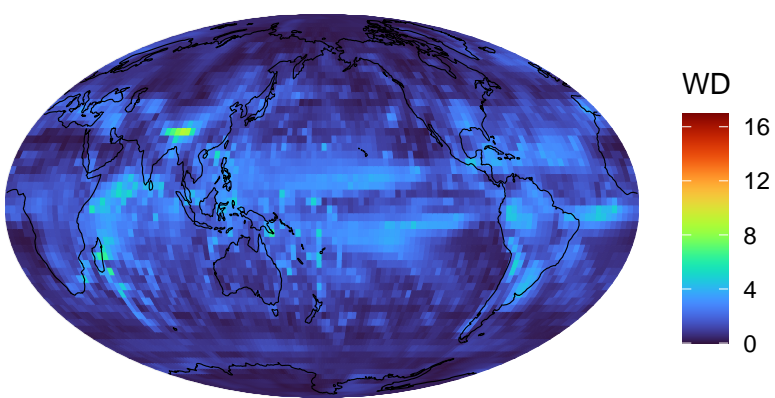

Supplement: supplementary_material [file attachment]
