# Supplementary material
Source: ML conference proceedings conference paper supplement (https://openreview.net/forum?id=mmSFfib6pI)

SCWD Map from NCEP to ERA5  
2m Surface Temperature

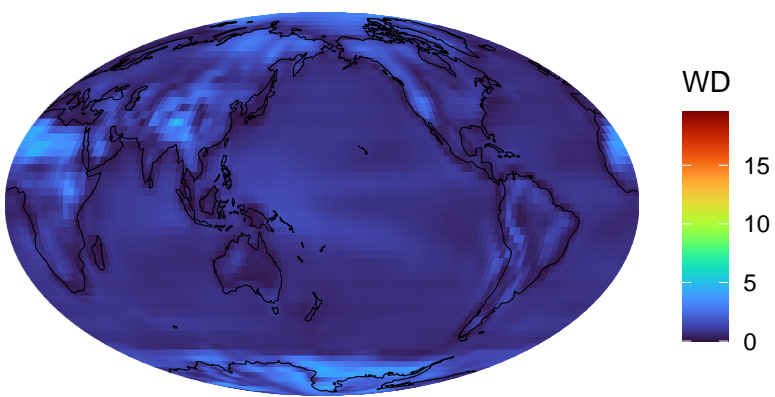

SCWD Map from CanESM2 to ERA5  
2m Surface Temperature

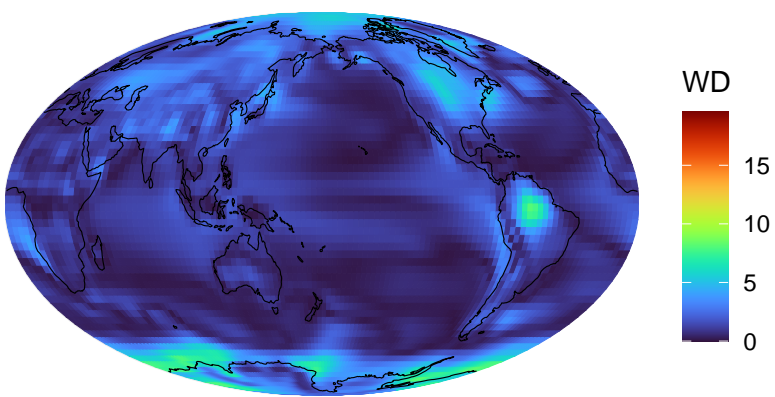

SCWD Map from ACCESS1-0 to ERA5  
2m Surface Temperature

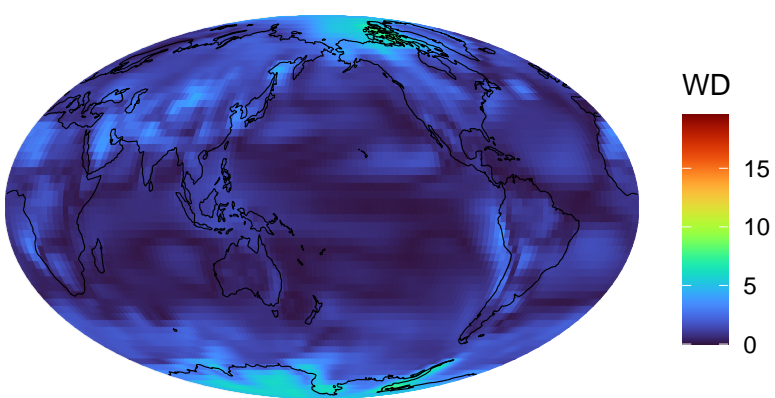

SCWD Map from CMCC-CESM to ERA5  
2m Surface Temperature

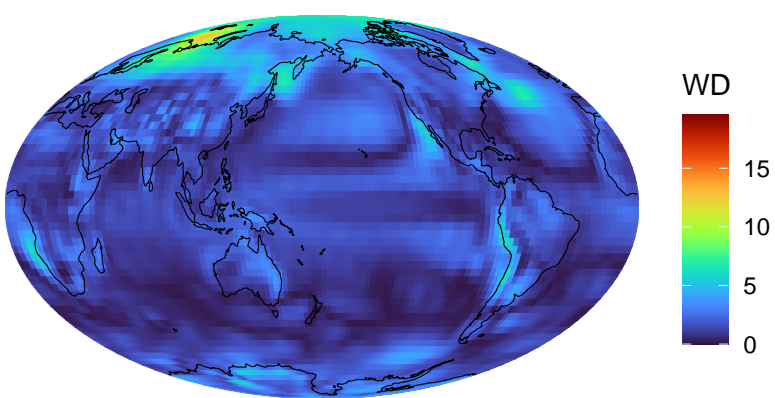

SCWD Map from ACCESS1-3 to ERA5  
2m Surface Temperature

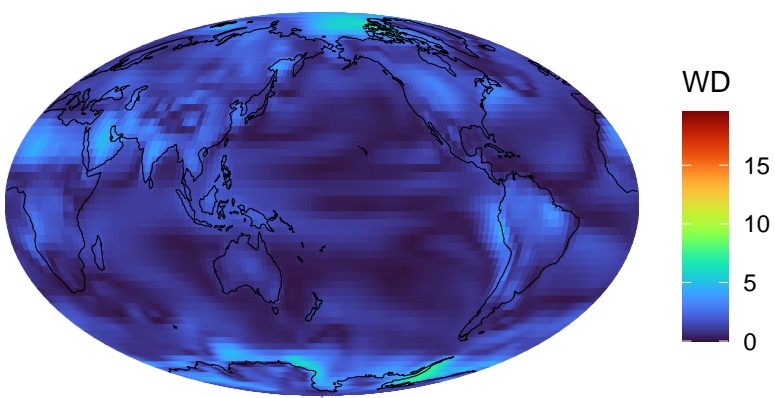

SCWD Map from CMCC-CM to ERA5  
2m Surface Temperature

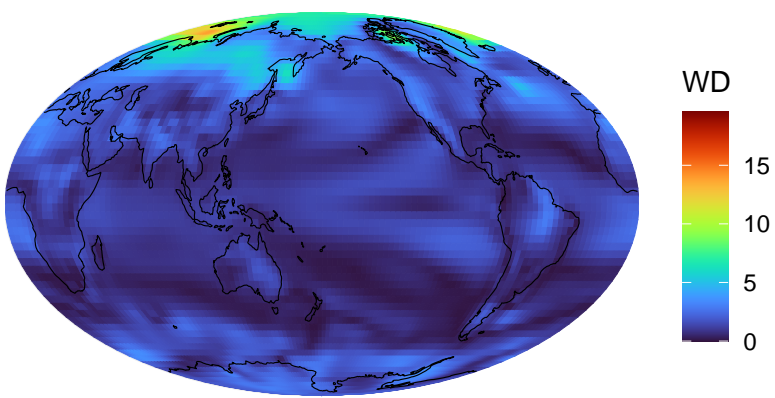

SCWD Map from CMCC-CMS to ERA5  
2m Surface Temperature

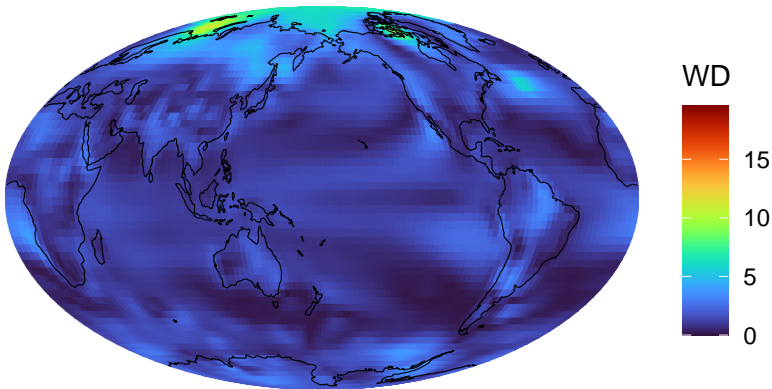

SCWD Map from EC-EARTH to ERA5  
2m Surface Temperature

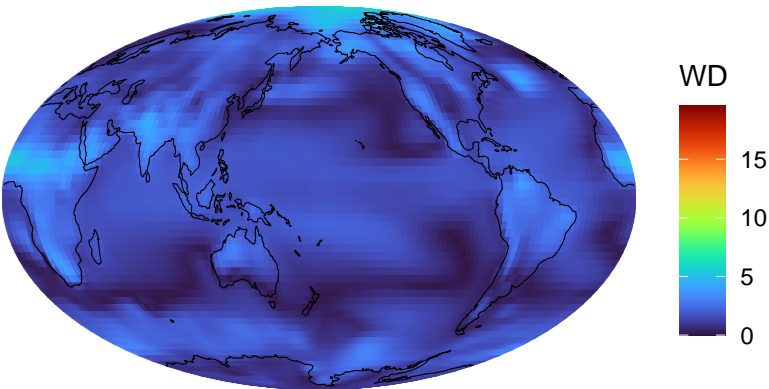

SCWD Map from CNRM-CM5 to ERA5  
2m Surface Temperature

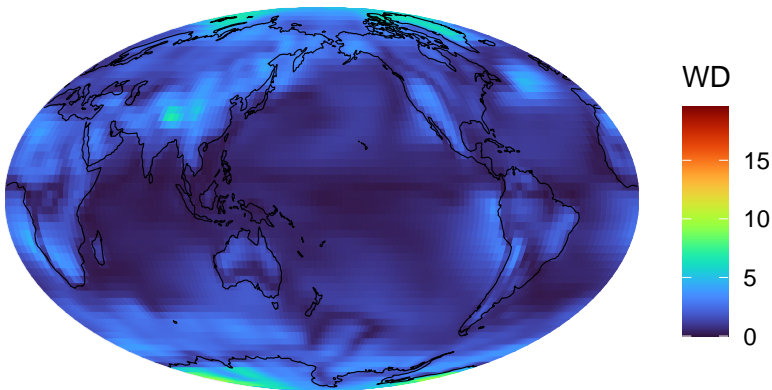

SCWD Map from FGOALS-g2 to ERA5  
2m Surface Temperature

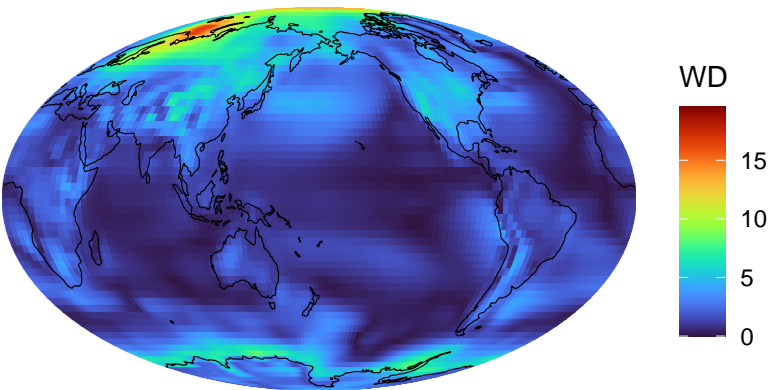

SCWD Map from CSIRO-Mk3-6-0 to ERA5  
2m Surface Temperature

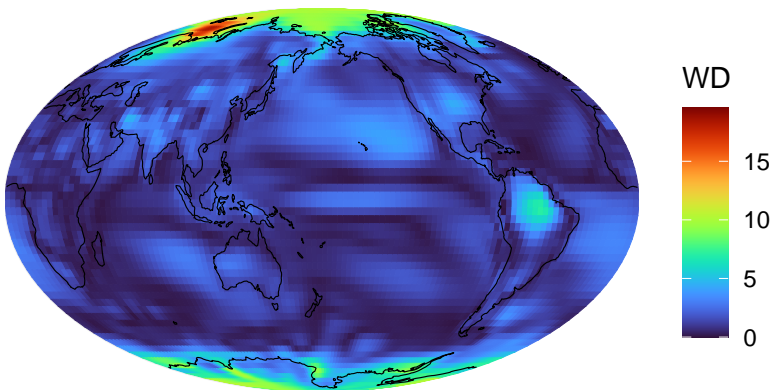

SCWD Map from FGOALS-s2 to ERA5  
2m Surface Temperature

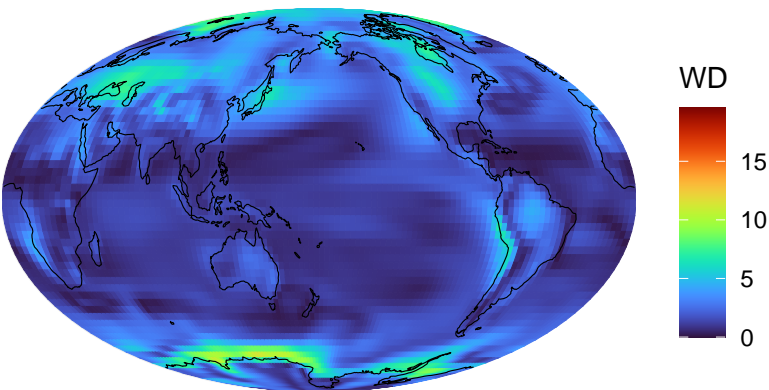



SCWD Map from GFDL-CM3 to ERA5  
2m Surface Temperature

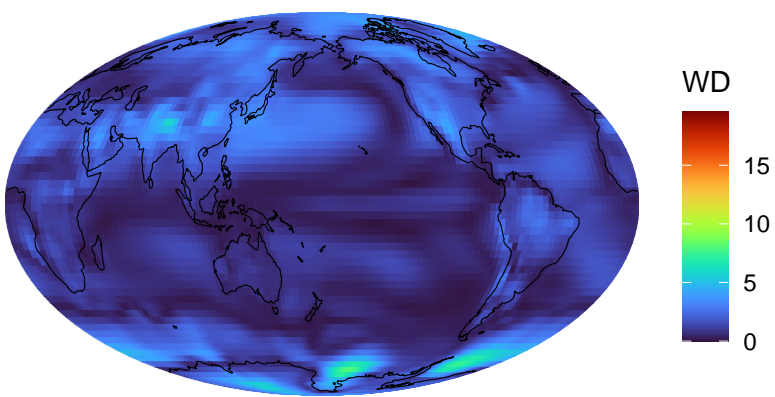

SCWD Map from HadCM3 to ERA5  
2m Surface Temperature

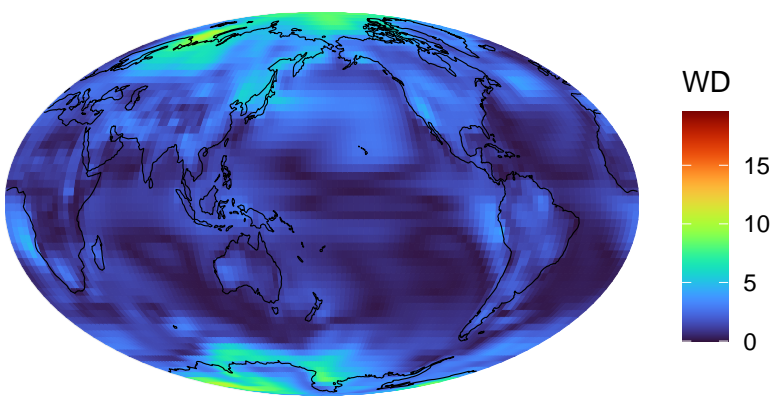

SCWD Map from GFDL-ESM2G to ERA5  
2m Surface Temperature

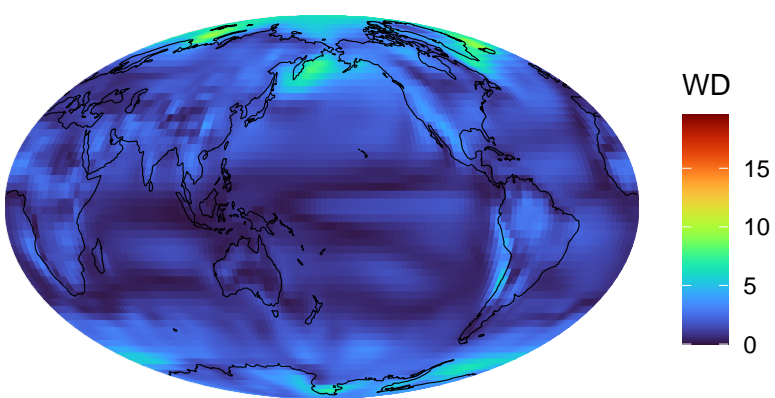

SCWD Map from HadGEM2-AO to ERA5  
2m Surface Temperature

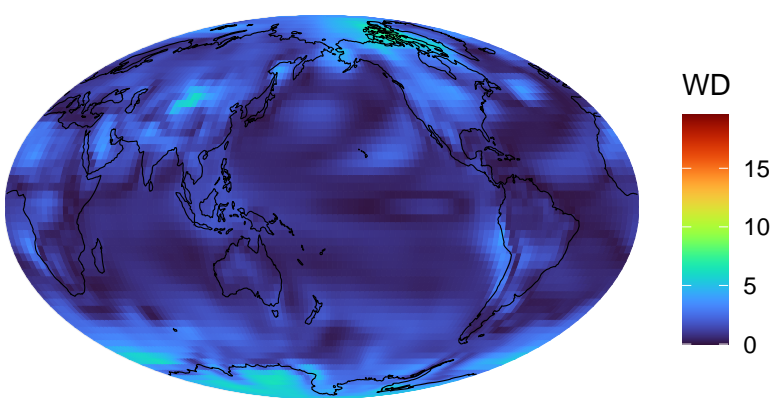

SCWD Map from GFDL-ESM2M to ERA5  
2m Surface Temperature

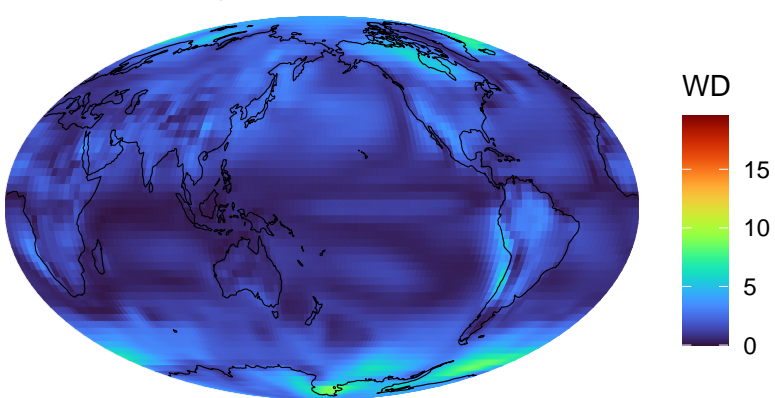

SCWD Map from HadGEM2-CC to ERA5  
2m Surface Temperature

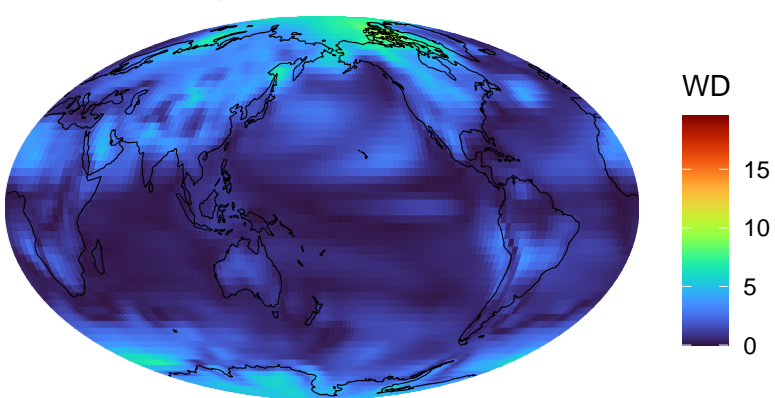

SCWD Map from HadGEM2-ES to ERA5  
2m Surface Temperature

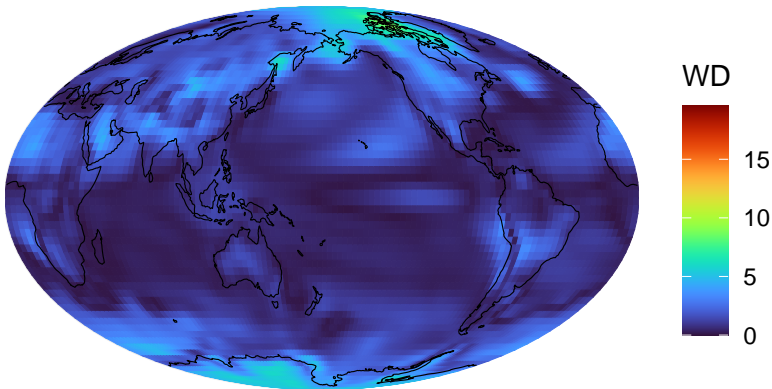

SCWD Map from IPSL-CM5A-MR to ERA5  
2m Surface Temperature

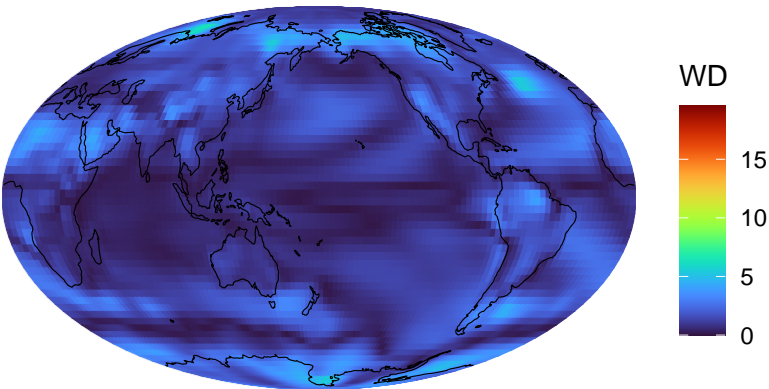

SCWD Map from inmcm4 to ERA5  
2m Surface Temperature

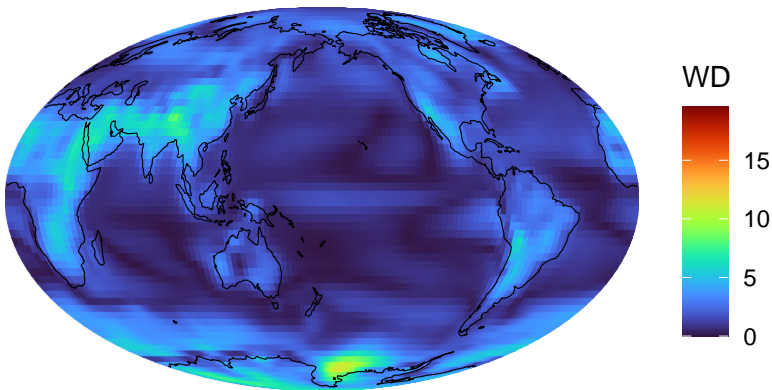

SCWD Map from IPSL-CM5B-LR to ERA5  
2m Surface Temperature

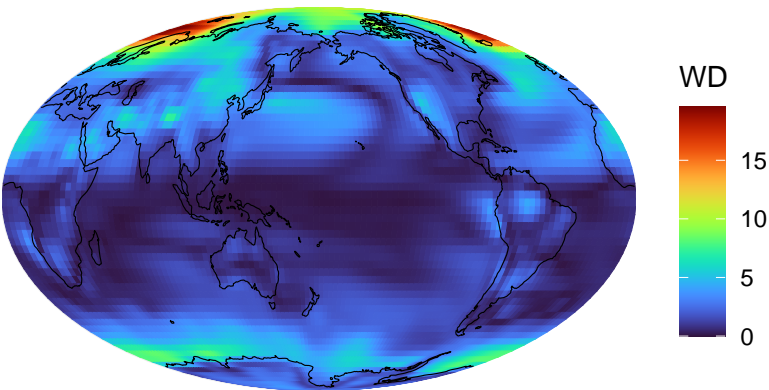

SCWD Map from IPSL-CM5A-LR to ERA5  
2m Surface Temperature

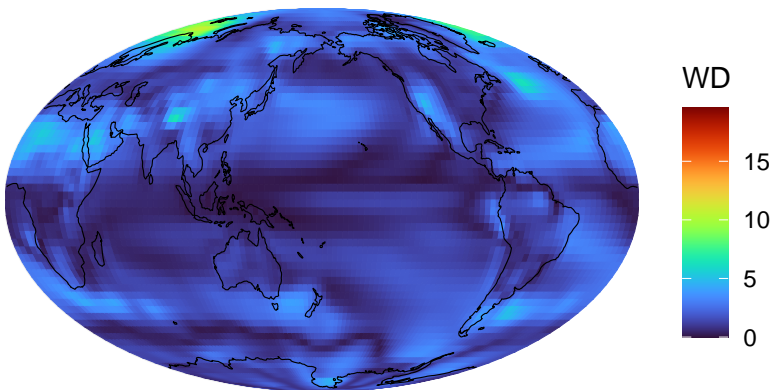

SCWD Map from MIROC-ESM-CHEM to ERA5  
2m Surface Temperature

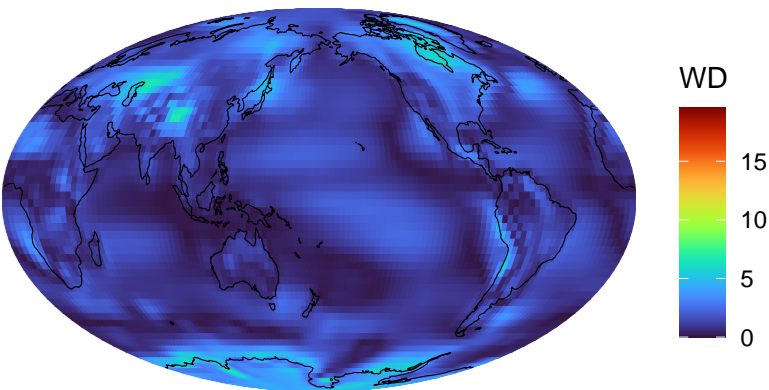



SCWD Map from MIROC-ESM to ERA5  
2m Surface Temperature

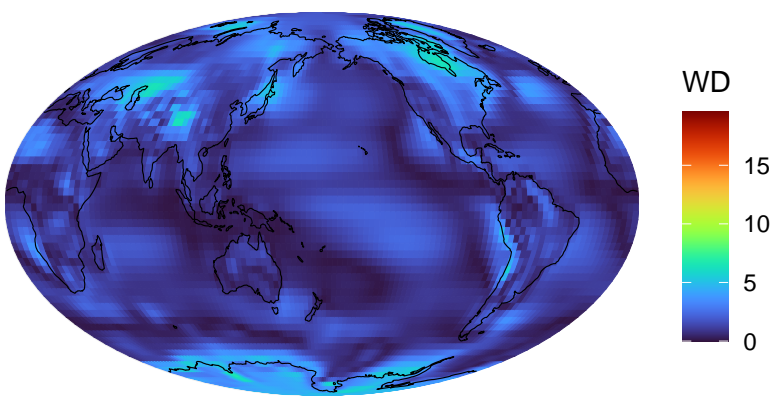

SCWD Map from MPI-ESM-LR to ERA5  
2m Surface Temperature

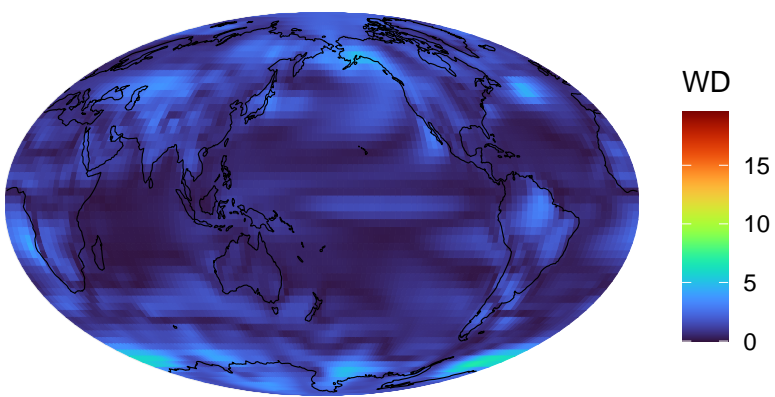

SCWD Map from MIROC4h to ERA5  
2m Surface Temperature

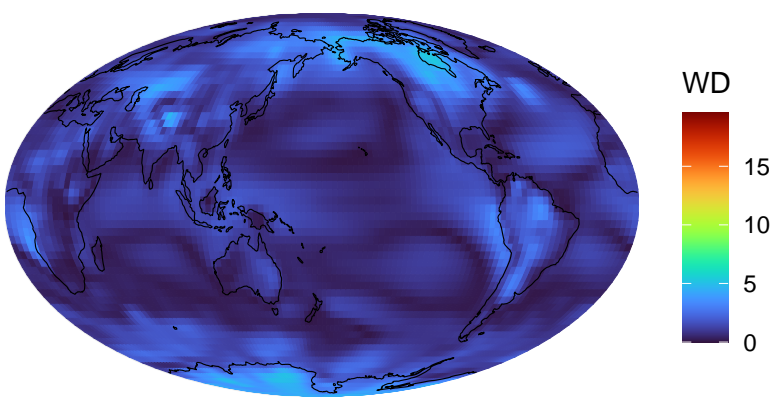

SCWD Map from MPI-ESM-MR to ERA5  
2m Surface Temperature

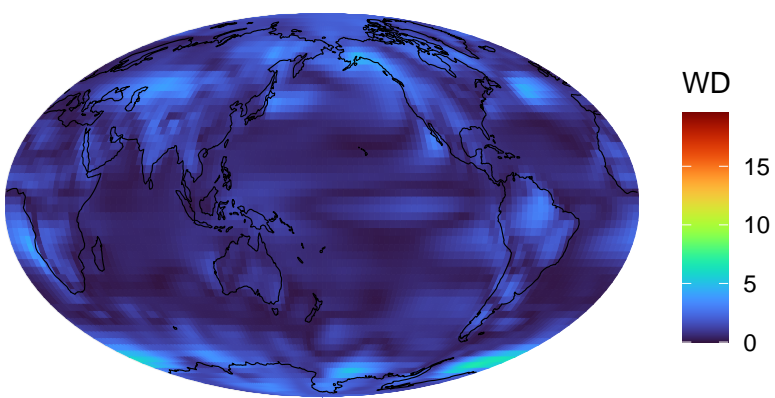

SCWD Map from MIROC5 to ERA5  
2m Surface Temperature

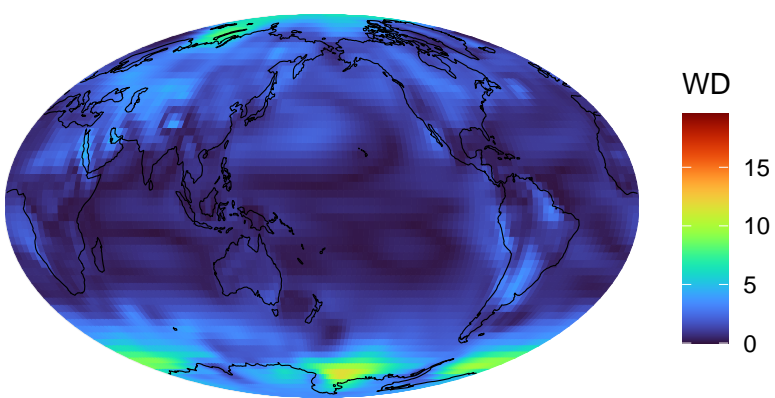

SCWD Map from MPI-ESM-P to ERA5  
2m Surface Temperature

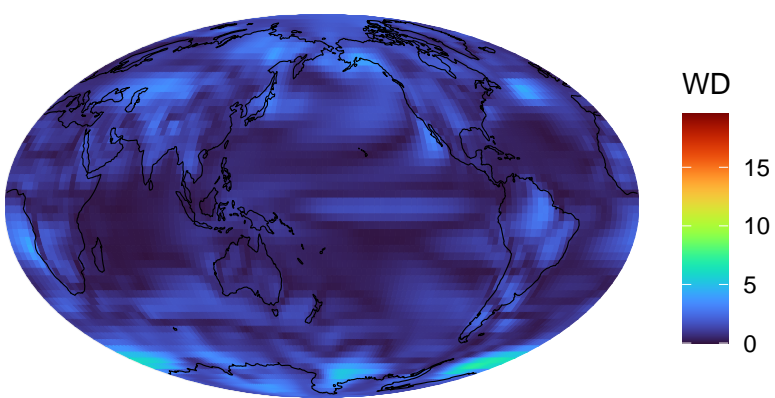

SCWD Map from MRI-CGCM3 to ERA5  
2m Surface Temperature

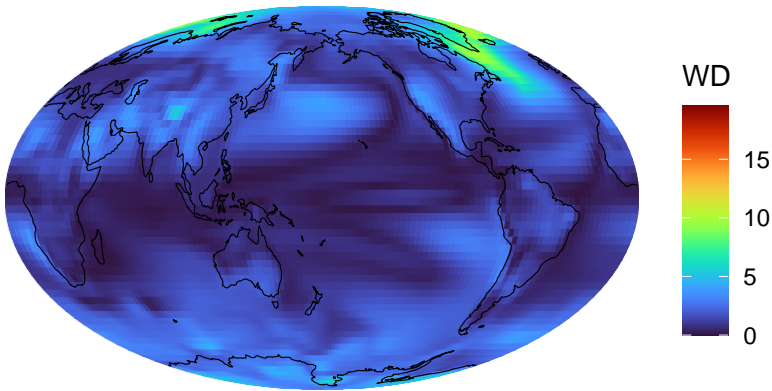

SCWD Map from ACCESS-CM2 to ERA5  
2m Surface Temperature

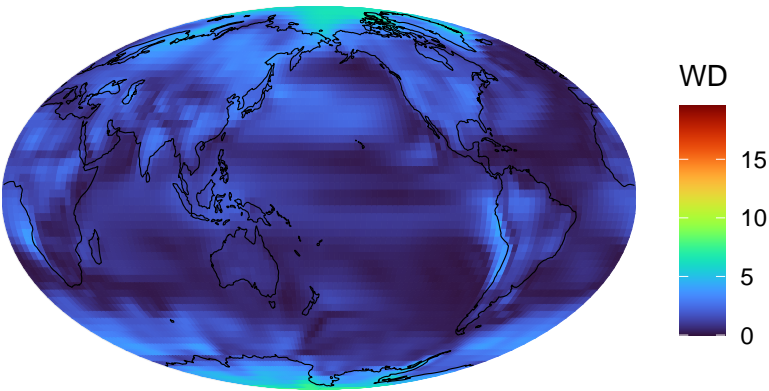

SCWD Map from MRI-ESM1 to ERA5  
2m Surface Temperature

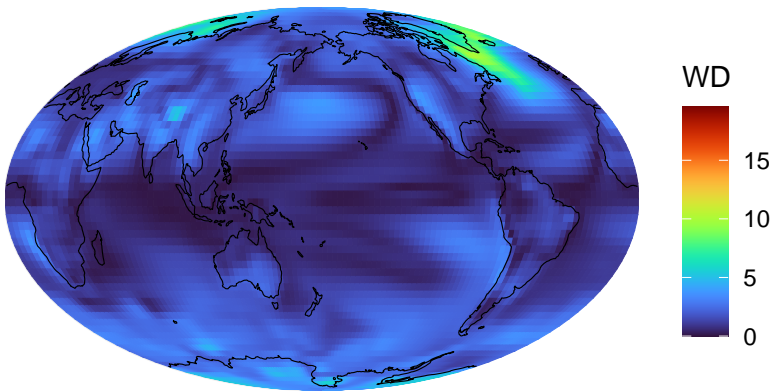

SCWD Map from ACCESS-ESM1-5 to ERA5  
2m Surface Temperature

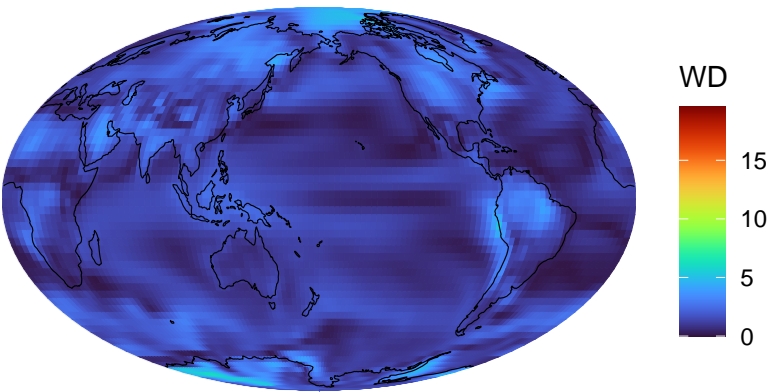

SCWD Map from NorESM1-M to ERA5  
2m Surface Temperature

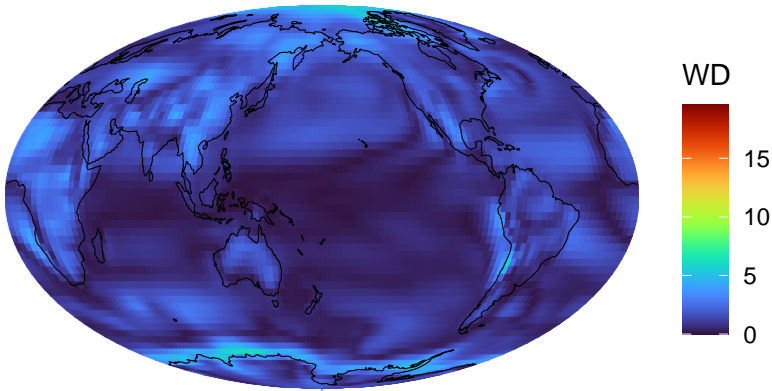

SCWD Map from AWI-CM-1-1-MR to ERA5  
2m Surface Temperature

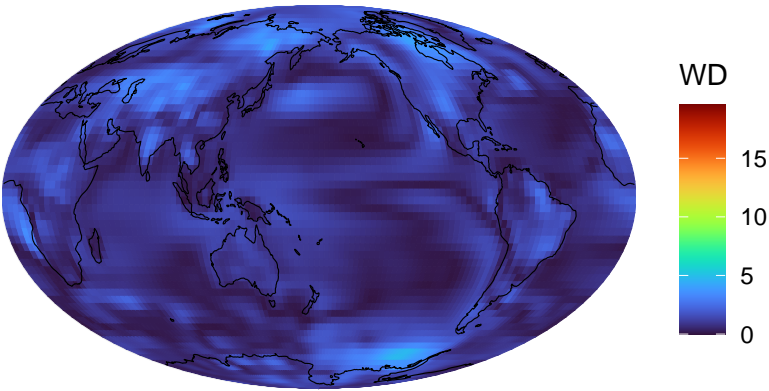



SCWD Map from AWI-ESM-1-1-LR to ERA5  
2m Surface Temperature

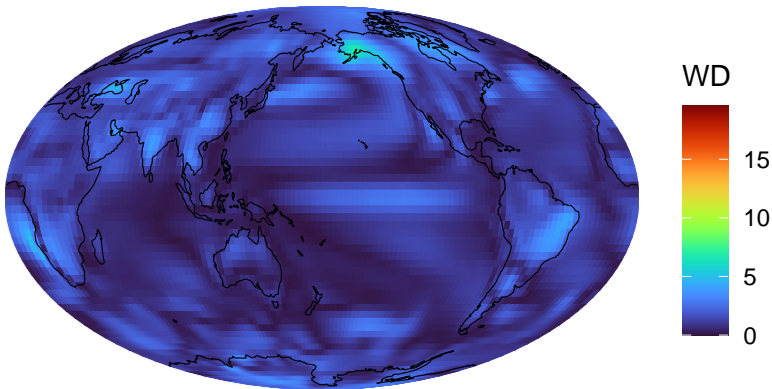

SCWD Map from CESM2-FV2 to ERA5  
2m Surface Temperature

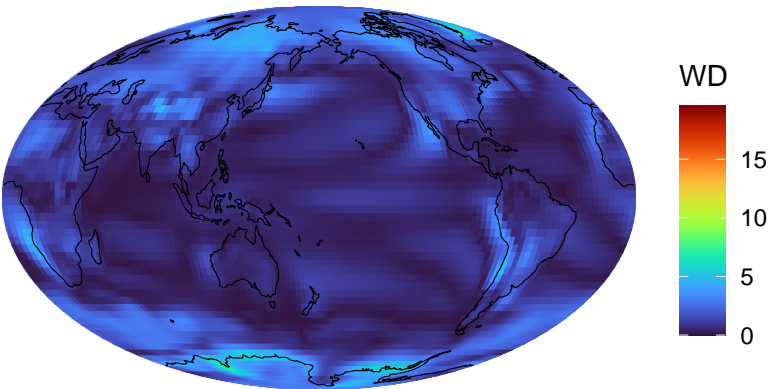

SCWD Map from BCC-ESM1 to ERA5  
2m Surface Temperature

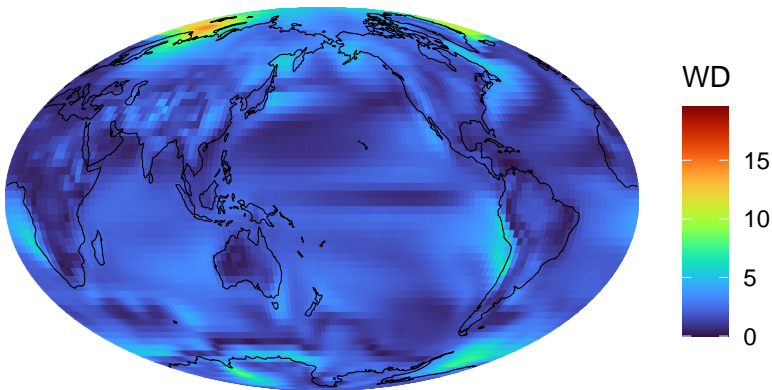

SCWD Map from CESM2-WACCM-FV2 to ERA5  
2m Surface Temperature

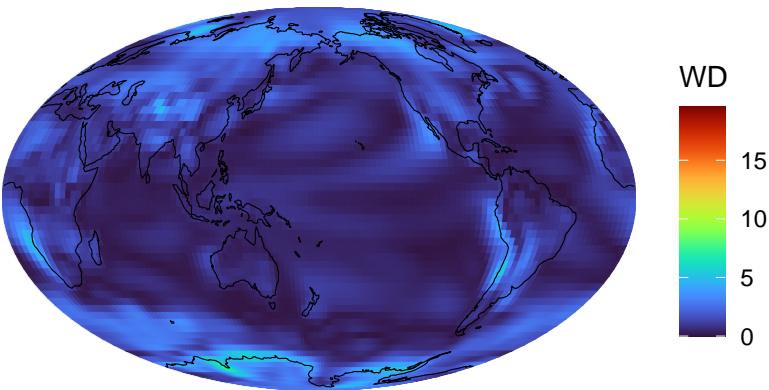

SCWD Map from CanESM5 to ERA5  
2m Surface Temperature

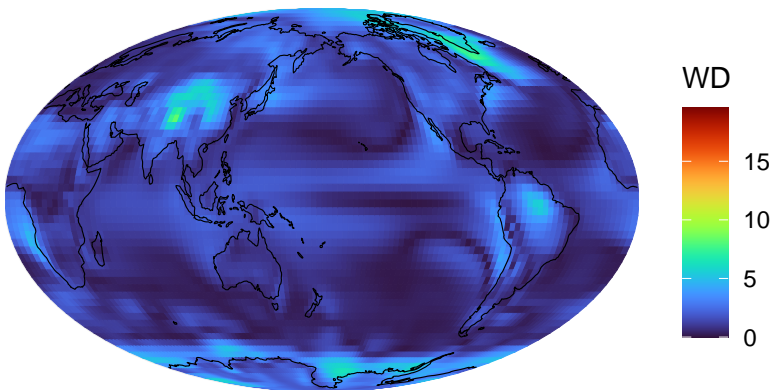

SCWD Map from CESM2-WACCM to ERA5  
2m Surface Temperature

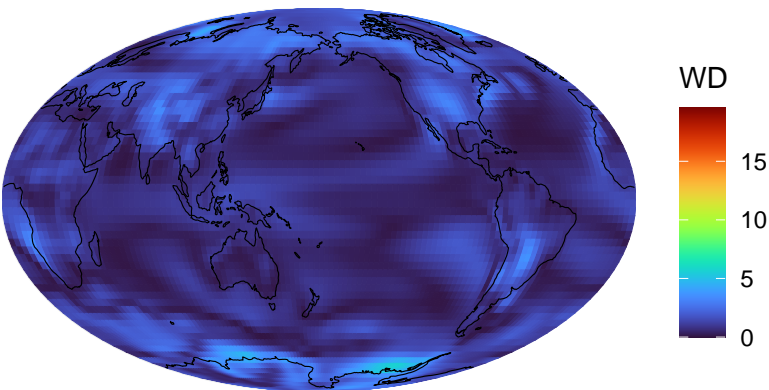

SCWD Map from CESM2 to ERA5  
2m Surface Temperature

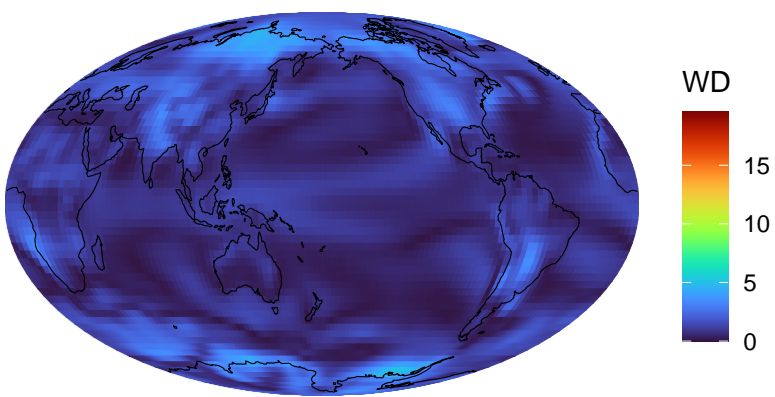

SCWD Map from CMCC-ESM2 to ERA5  
2m Surface Temperature

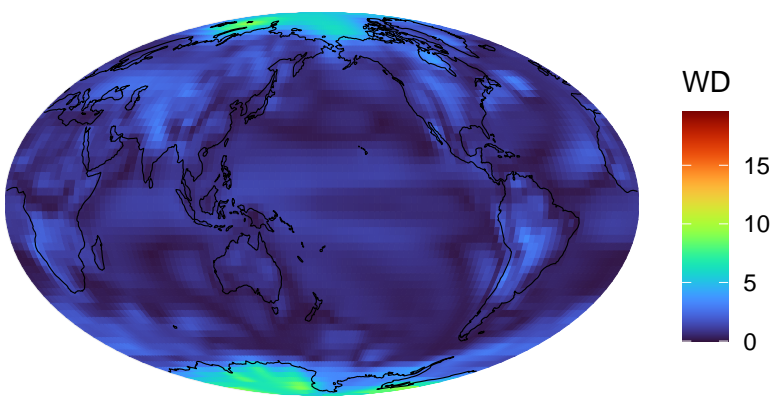

SCWD Map from CMCC-CM2-HR4 to ERA5  
2m Surface Temperature

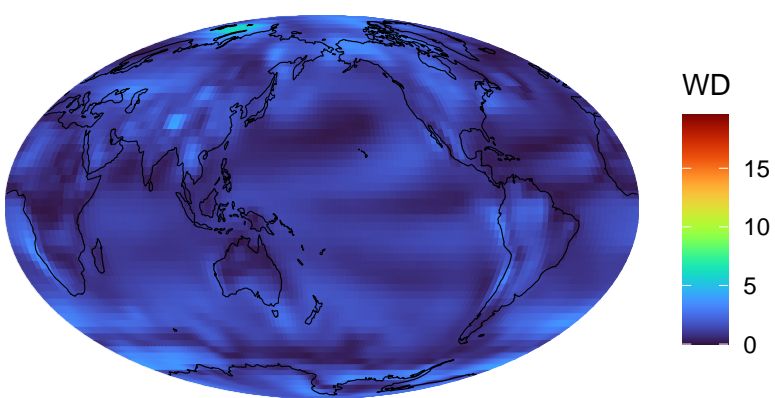

SCWD Map from E3SM-1-0 to ERA5  
2m Surface Temperature

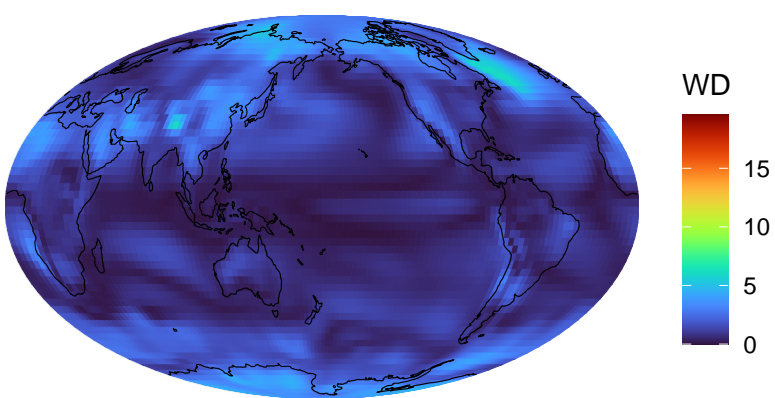

SCWD Map from CMCC-CM2-SR5 to ERA5  
2m Surface Temperature

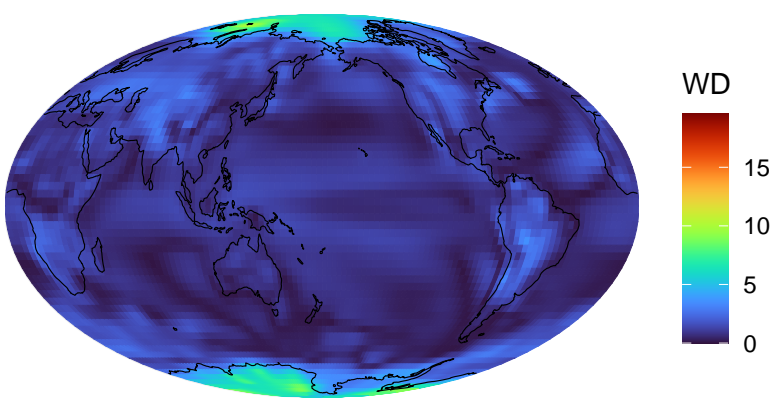

SCWD Map from E3SM-2-0-NARRM to ERA5  
2m Surface Temperature

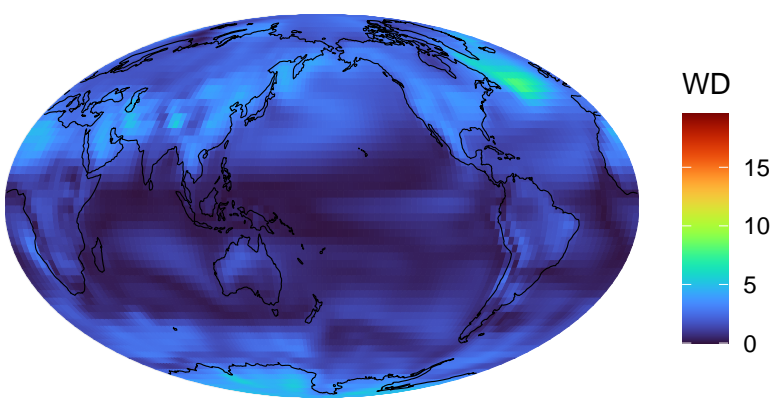



SCWD Map from E3SM-2-0 to ERA5  
2m Surface Temperature

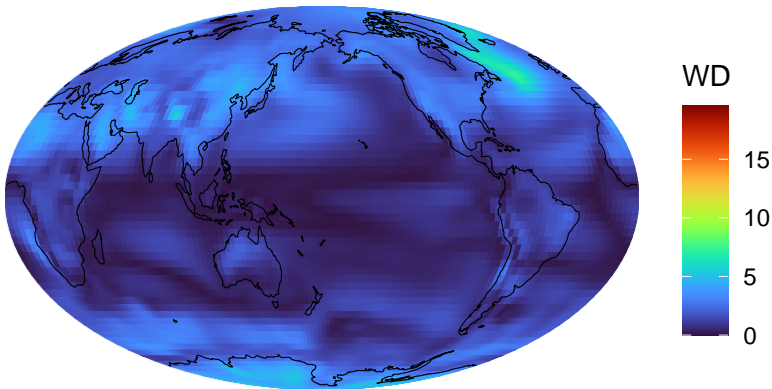

SCWD Map from EC-Earth3-Veg-LR to ERA5  
2m Surface Temperature

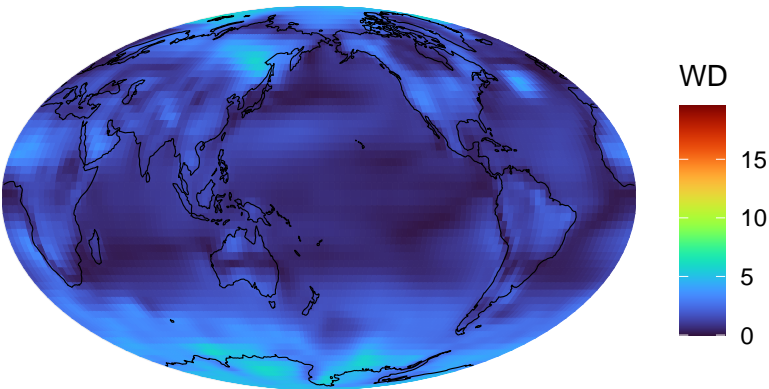

SCWD Map from EC-Earth3-AerChem to ERA5  
2m Surface Temperature

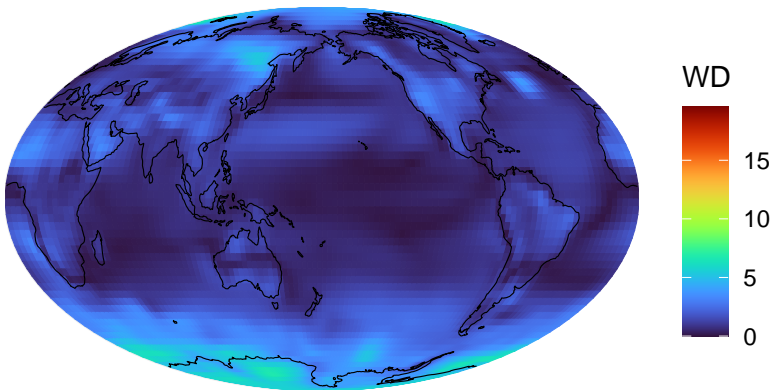

SCWD Map from EC-Earth3-Veg to ERA5  
2m Surface Temperature

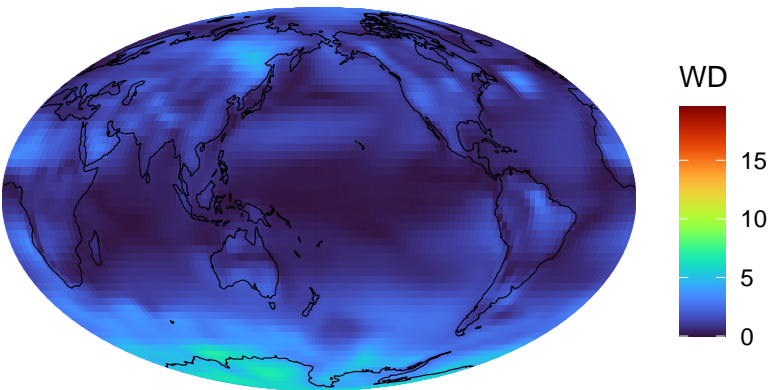

SCWD Map from EC-Earth3-CC to ERA5  
2m Surface Temperature

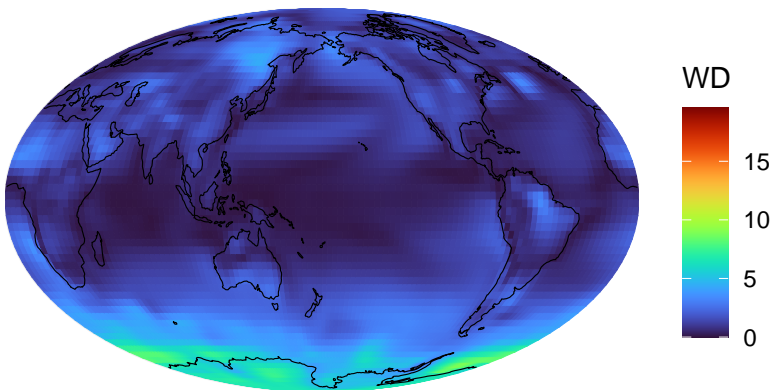

SCWD Map from EC-Earth3 to ERA5  
2m Surface Temperature

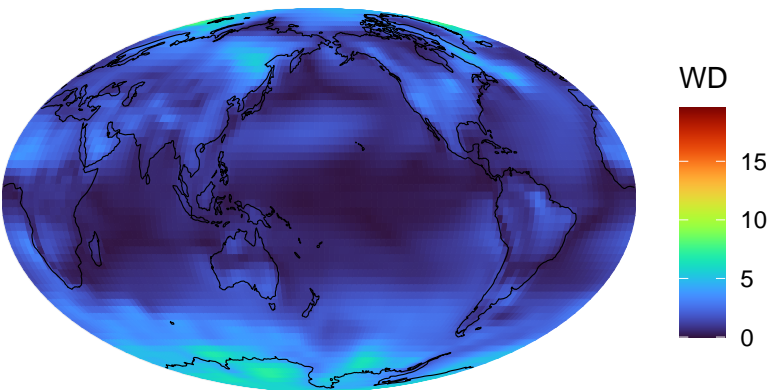

SCWD Map from FGOALS-f3-L to ERA5  
2m Surface Temperature

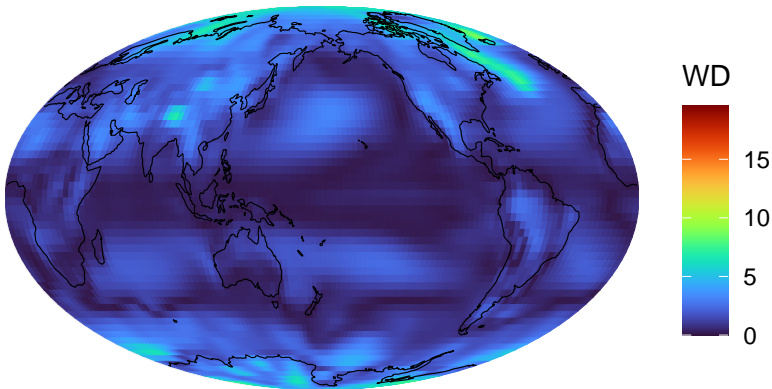

SCWD Map from GFDL-ESM4 to ERA5  
2m Surface Temperature

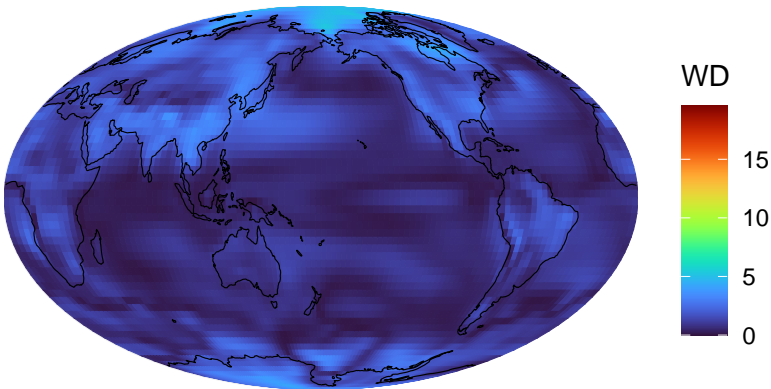

SCWD Map from FGOALS-g3 to ERA5  
2m Surface Temperature

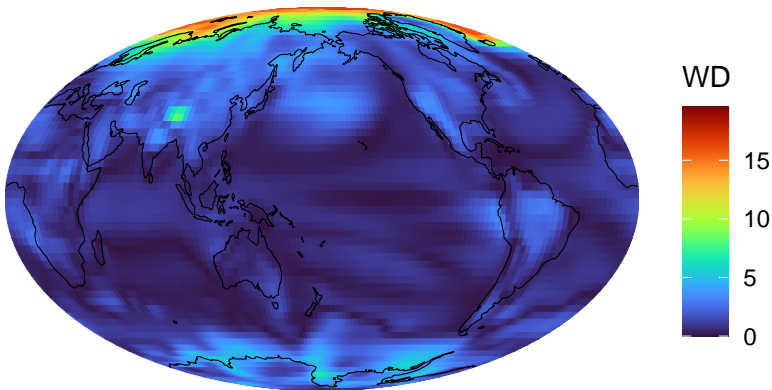

SCWD Map from GISS-E2-2-G to ERA5  
2m Surface Temperature

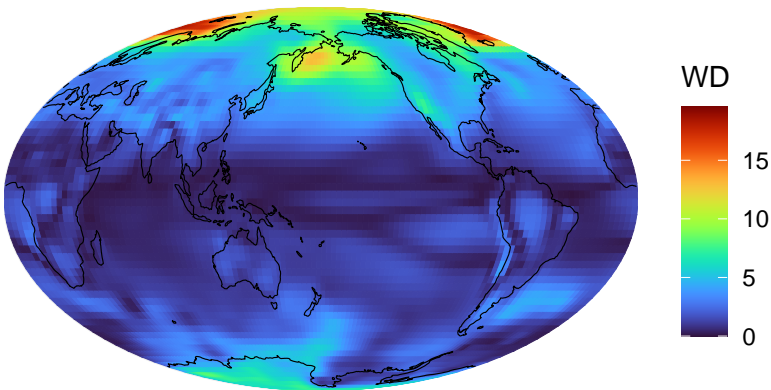

SCWD Map from GFDL-CM4 to ERA5  
2m Surface Temperature

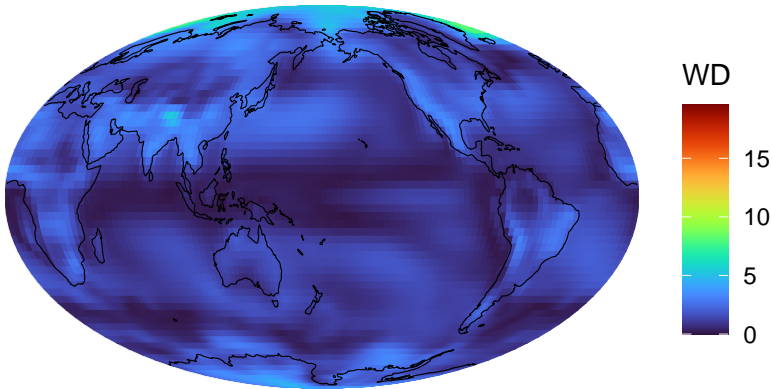

SCWD Map from ICON-ESM-LR to ERA5  
2m Surface Temperature

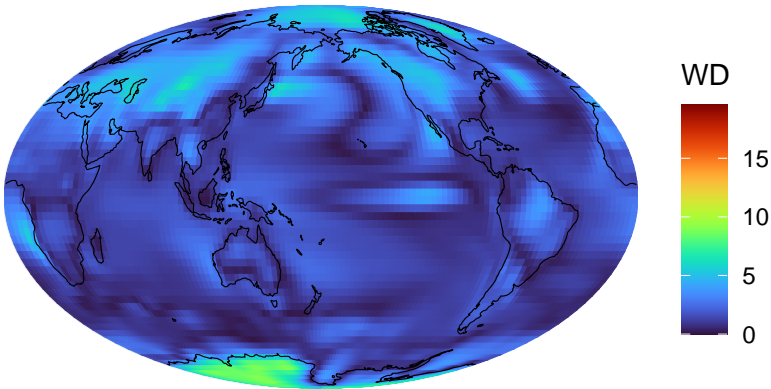



SCWD Map from IITM-ESM to ERA5  
2m Surface Temperature

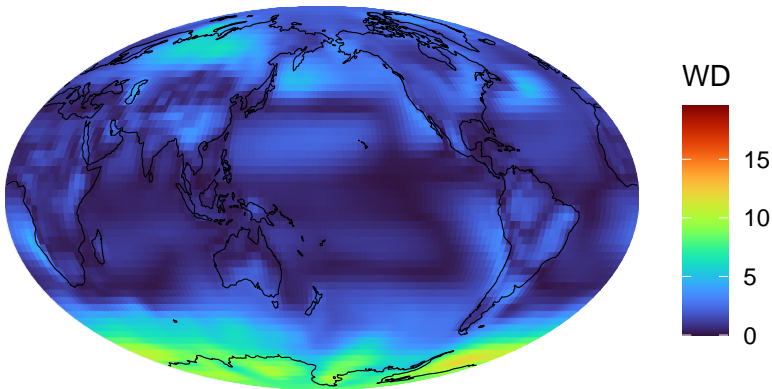

SCWD Map from IPSL-CM5A2-INCA to ERA5  
2m Surface Temperature

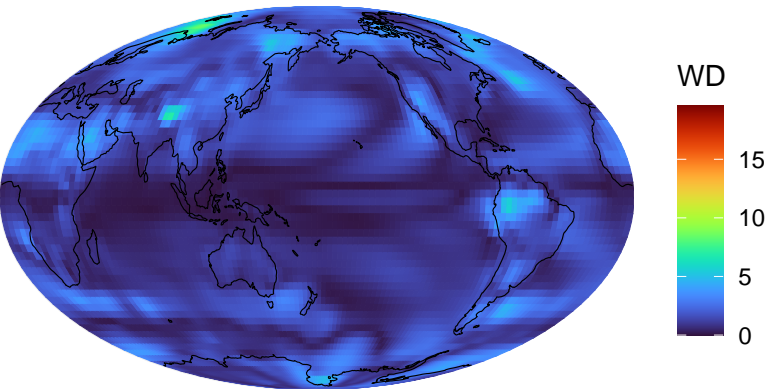

SCWD Map from INM-CM4-8 to ERA5  
2m Surface Temperature

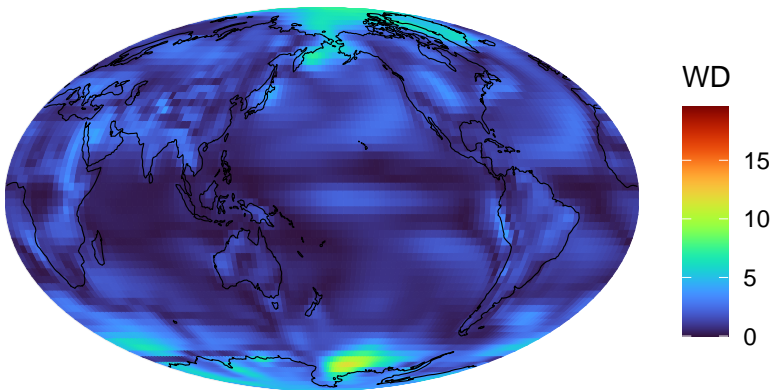

SCWD Map from IPSL-CM6A-LR to ERA5  
2m Surface Temperature

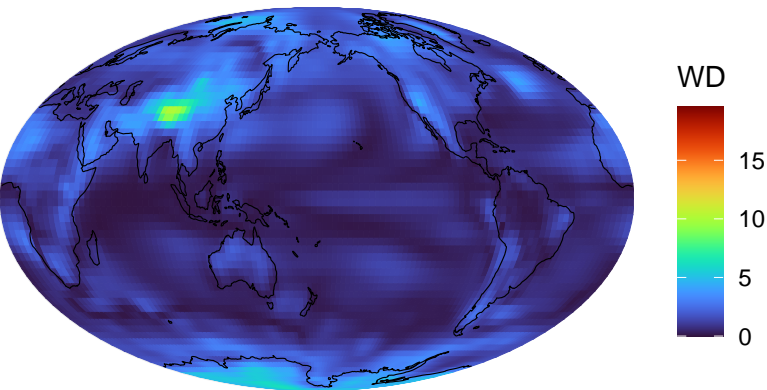

SCWD Map from INM-CM5-0 to ERA5  
2m Surface Temperature

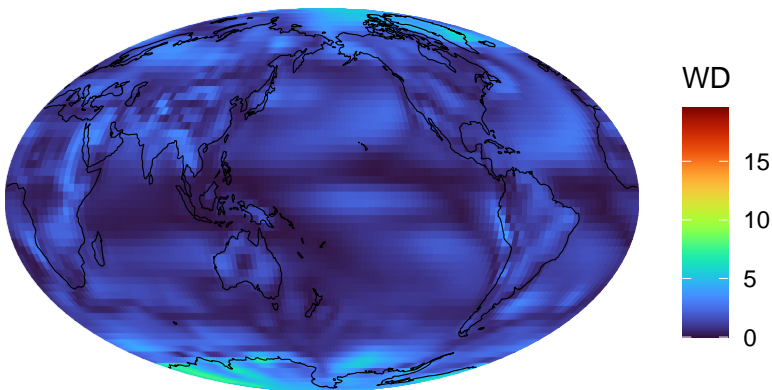

SCWD Map from KACE-1-0-G to ERA5  
2m Surface Temperature

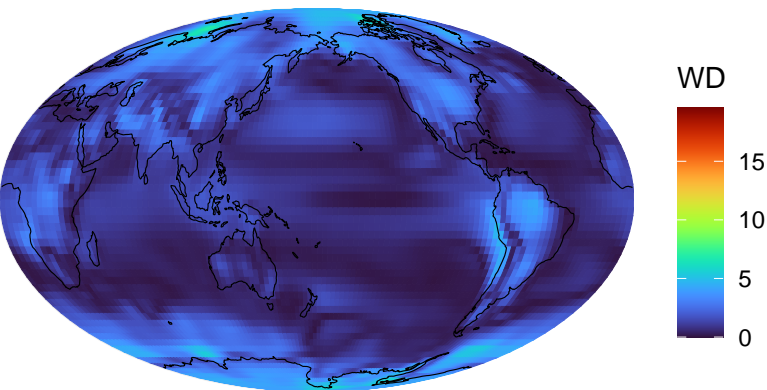

SCWD Map from KIOST-ESM to ERA5  
2m Surface Temperature

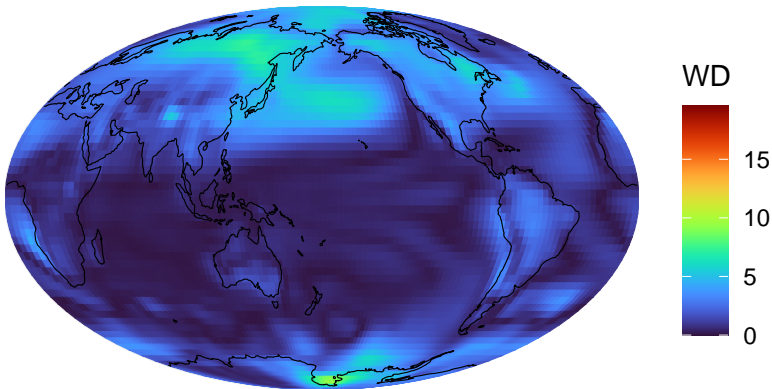

SCWD Map from MPI-ESM1-2-HR to ERA5  
2m Surface Temperature

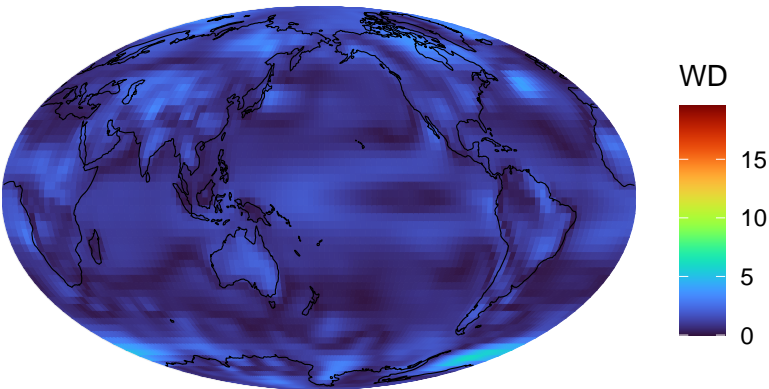

SCWD Map from MIROC6 to ERA5  
2m Surface Temperature

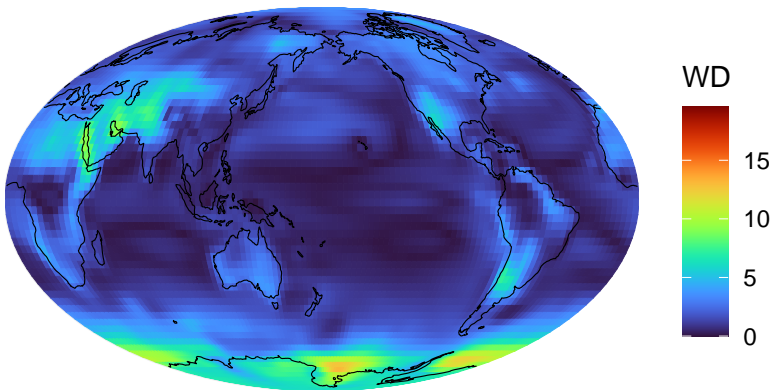

SCWD Map from MPI-ESM1-2-LR to ERA5  
2m Surface Temperature

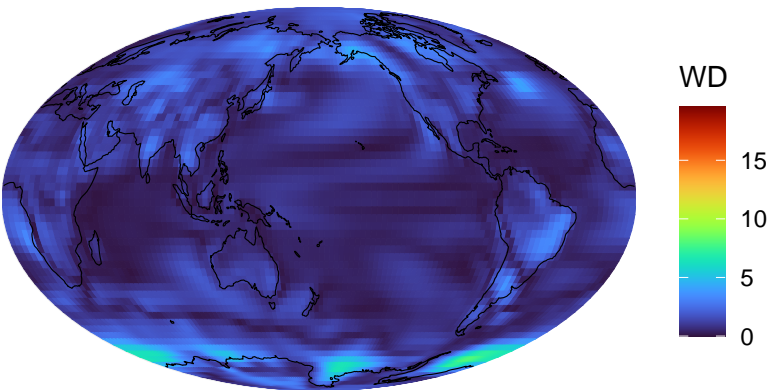

SCWD Map from MPI-ESM-1-2-HAM to ERA5  
2m Surface Temperature

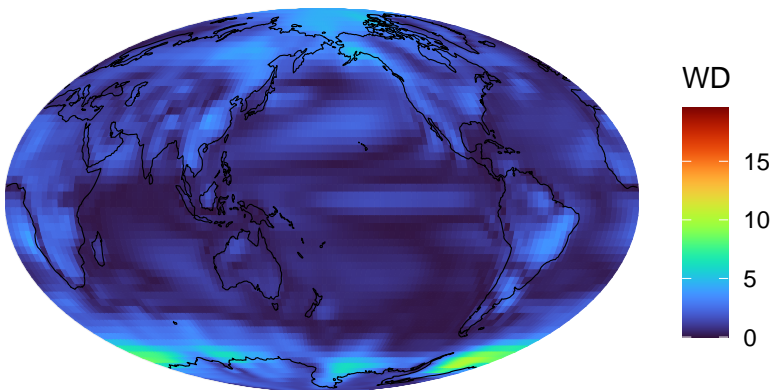

SCWD Map from MRI-ESM2-0 to ERA5  
2m Surface Temperature

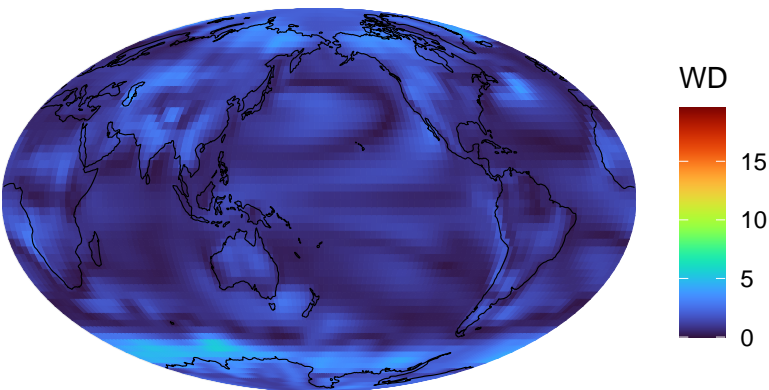



SCWD Map from NESM3 to ERA5  
2m Surface Temperature

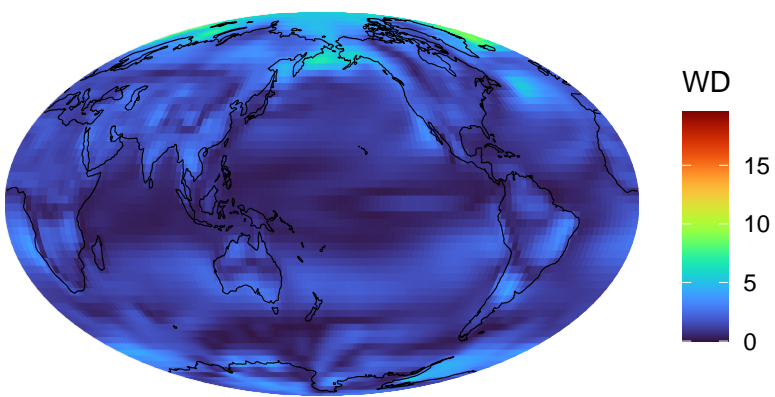

SCWD Map from NorESM2-MM to ERA5  
2m Surface Temperature

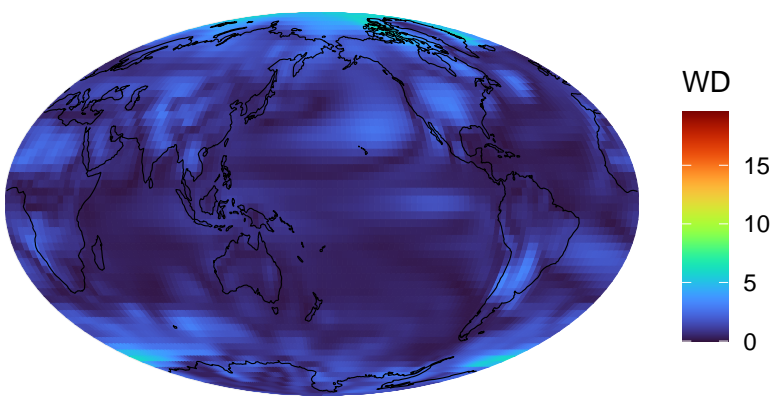

SCWD Map from NorCPM1 to ERA5  
2m Surface Temperature

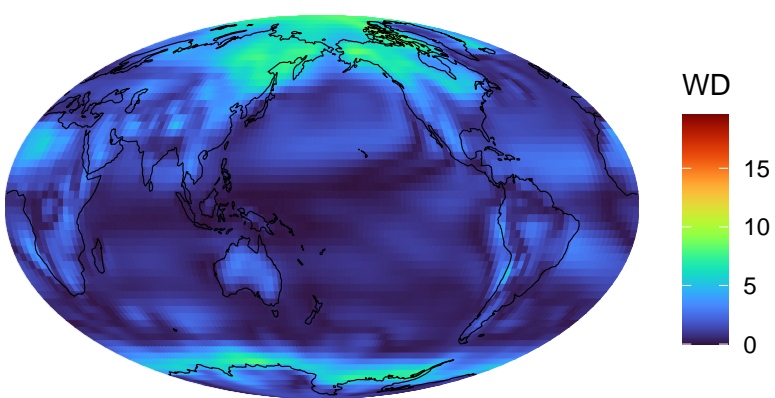

SCWD Map from SAM0-UNICON to ERA5  
2m Surface Temperature

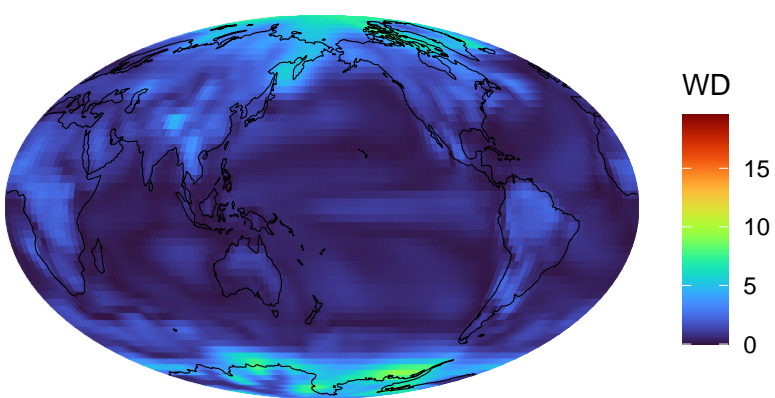

SCWD Map from NorESM2-LM to ERA5  
2m Surface Temperature

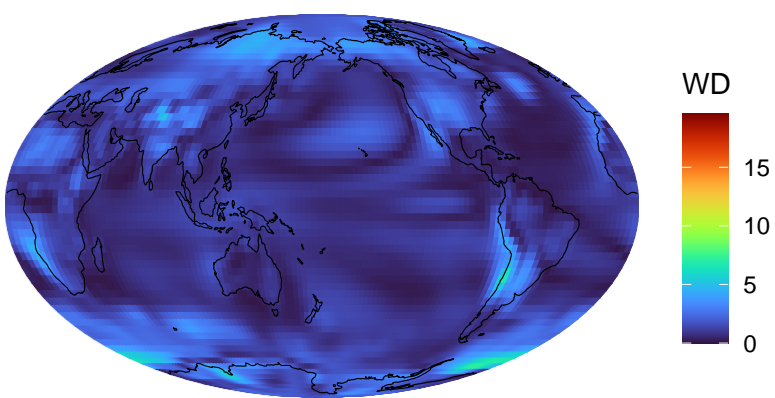

SCWD Map from TaiESM1 to ERA5  
2m Surface Temperature

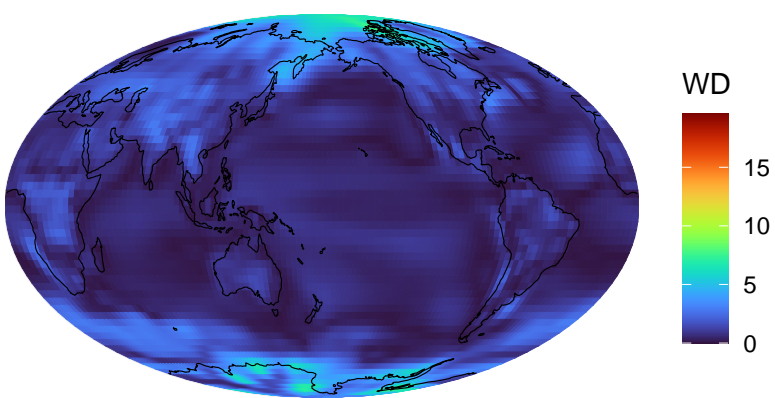

Supplement: supplementary_material [file attachment]
